# Supplementary material
Source: PubMed Central journal article supplement (PMC6410352)
Supplement: NIHMS1015511-supplement-Supplemental_data.pdf [file NIHMS1015511-supplement-Supplemental_data.pdf]

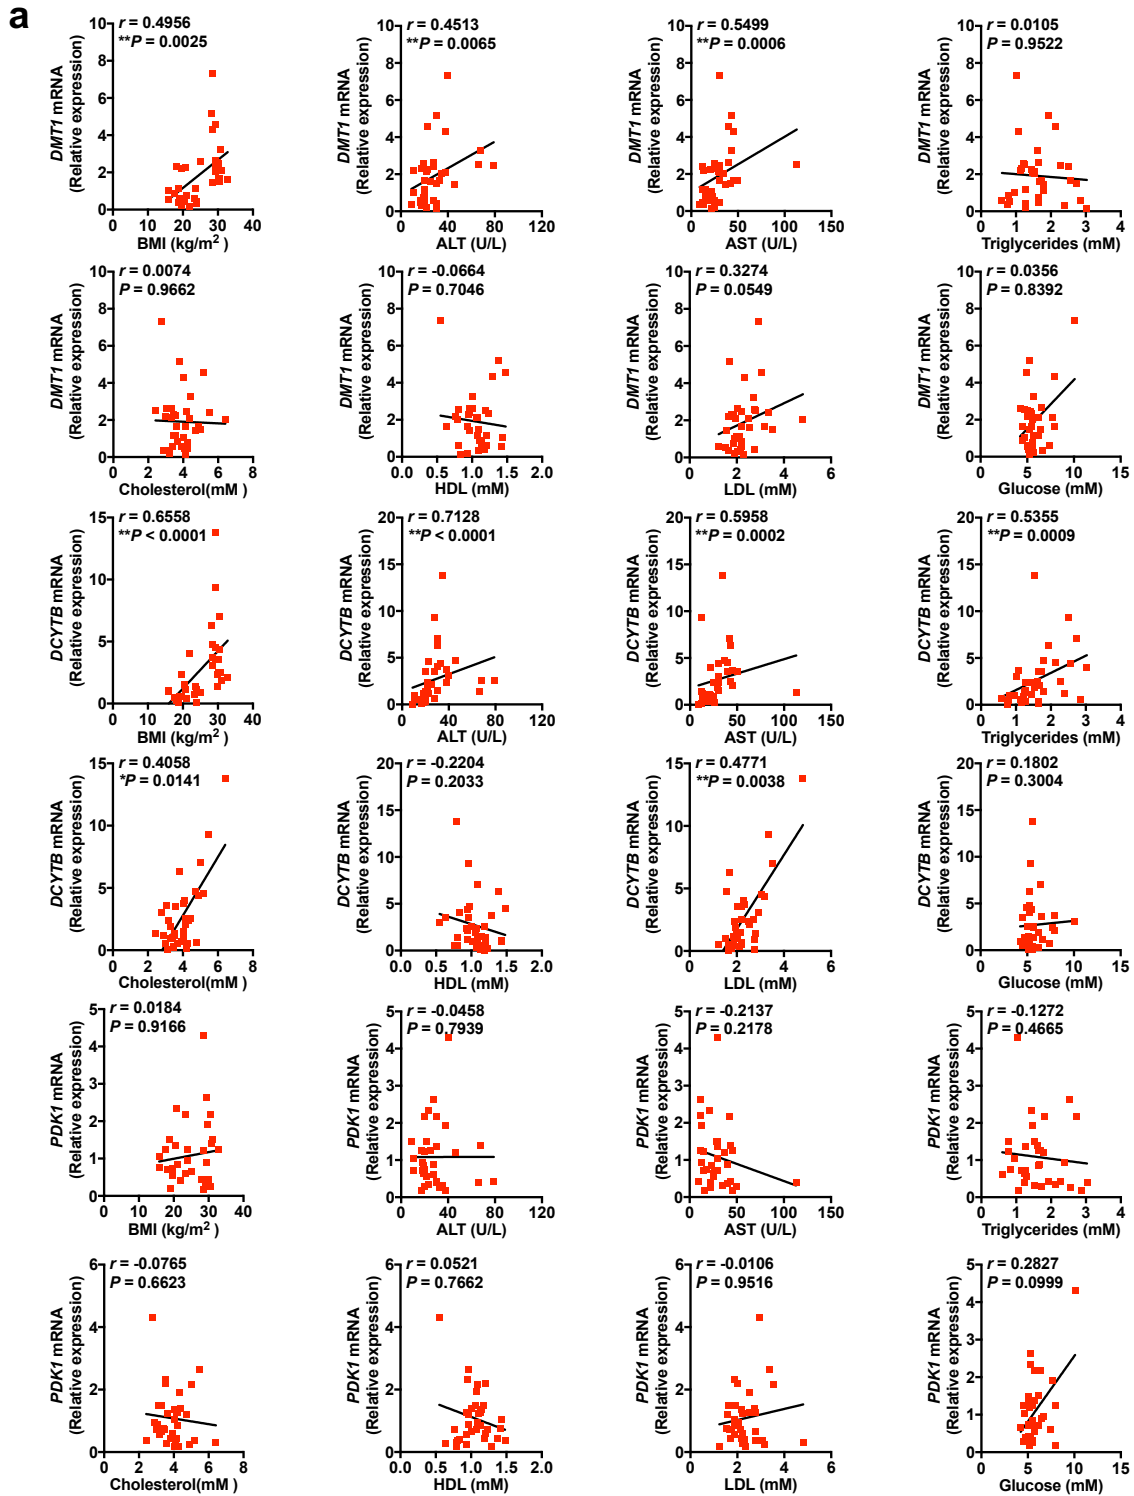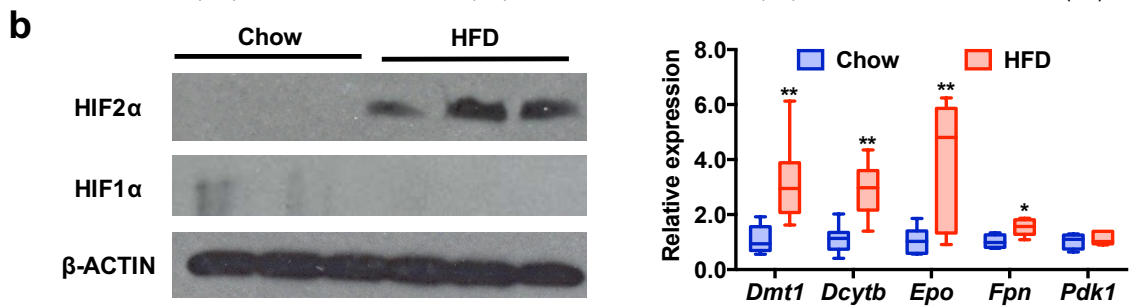

**Supplementary Figure 1.** Increased HIF2 $\alpha$  signaling in human ileum biopsies is correlated with obesity. **(a)** Correlative analysis of ileum *DMT1*, *DCYTB*, and *PDK1* mRNA levels with BMI, ALT, AST, triglycerides, cholesterol, HDL, LDL, and glucose.  $n = 35$ . Correlations were assessed by nonparametric Spearman's test. **(b)** Western blot analysis of HIF2 $\alpha$  and HIF1 $\alpha$  protein expression ( $n = 3$ /group) and mRNA expression analysis of their target genes in small intestine from chow or HFD-fed mice (1 week).  $n = 4$  for chow and  $n = 5$  for HFD. For box plots, the midline represents the median; box represents the interquartile range (IQR) between the first and third quartiles, and whiskers represent the lowest or highest values within 1.5 times IQR from the first or third quartiles. \* $P < 0.05$ , \*\* $P < 0.01$  versus chow, by two-tailed Student's  $t$ -test.

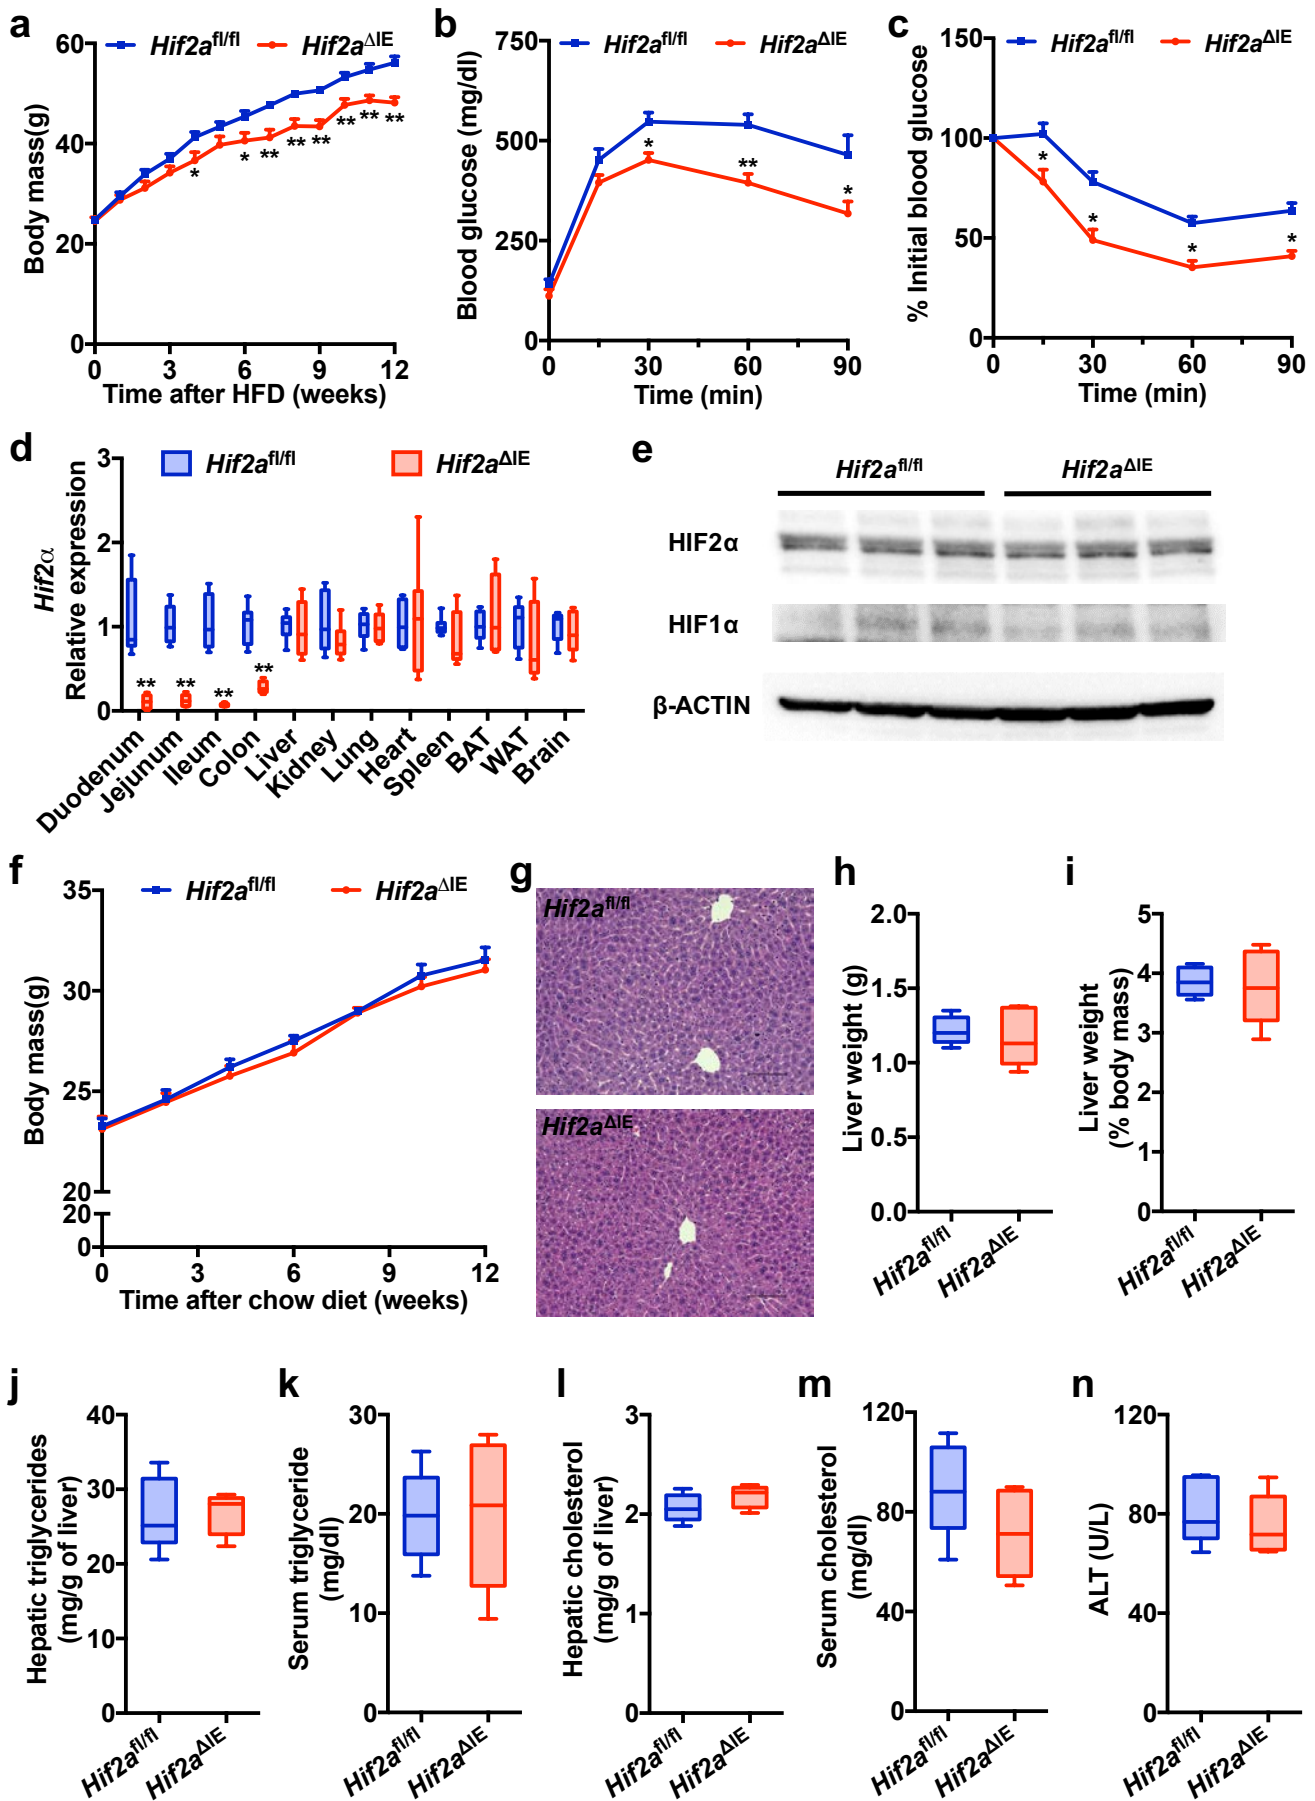

**Supplementary Figure 2.** Lack of intestinal HIF2 $\alpha$  prevents HFD-induced obesity and improves metabolic homeostasis. **(a)** Growth curves of HFD-fed *Hif2a*<sup>fl/fl</sup> and *Hif2a* <sup>$\Delta$ IE</sup> mice. **(b)** Glucose tolerance test of HFD-fed *Hif2a*<sup>fl/fl</sup> and *Hif2a* <sup>$\Delta$ IE</sup> mice. **(c)** Insulin tolerance test of HFD-fed *Hif2a*<sup>fl/fl</sup> and *Hif2a* <sup>$\Delta$ IE</sup> mice. **(d)** *Hif2a* mRNA expression in different tissues from HFD-fed *Hif2a*<sup>fl/fl</sup> and *Hif2a* <sup>$\Delta$ IE</sup> mice. **(e)** Western blot analysis of liver HIF2 $\alpha$  and HIF1 $\alpha$  from HFD-fed *Hif2a*<sup>fl/fl</sup> and *Hif2a* <sup>$\Delta$ IE</sup> mice ( $n = 3$ /group). **(f)** Growth curves of chow-fed *Hif2a*<sup>fl/fl</sup> and *Hif2a* <sup>$\Delta$ IE</sup> mice. **(g)** Representative H&E staining of liver sections of chow-fed *Hif2a*<sup>fl/fl</sup> and *Hif2a* <sup>$\Delta$ IE</sup> mice ( $n = 15$ , 3 images/mouse). Scale bars, 100  $\mu$ m. **(h)** Liver weights of chow-fed *Hif2a*<sup>fl/fl</sup> and *Hif2a* <sup>$\Delta$ IE</sup> mice. **(i)** Liver weight to body weight ratios of chow-fed *Hif2a*<sup>fl/fl</sup> and *Hif2a* <sup>$\Delta$ IE</sup> mice. **(j, k)** Liver **(j)** and serum **(k)** triglyceride content of chow-fed *Hif2a*<sup>fl/fl</sup> and *Hif2a* <sup>$\Delta$ IE</sup> mice. **(l, m)** Liver **(l)** and serum **(m)** cholesterol content of chow-fed *Hif2a*<sup>fl/fl</sup> and *Hif2a* <sup>$\Delta$ IE</sup> mice. **(n)** Serum ALT levels of chow-fed *Hif2a*<sup>fl/fl</sup> and *Hif2a* <sup>$\Delta$ IE</sup> mice.  $n = 5$ /group. Data are presented as the mean  $\pm$  sem. For box plots, the midline represents the median; box represents the IQR between the first and third quartiles, and whiskers represent the lowest or highest values within 1.5 times IQR from the first or third quartiles. \* $P < 0.05$ , \*\* $P < 0.01$  versus *Hif2a*<sup>fl/fl</sup> mice, by two-tailed Student's  $t$ -test.

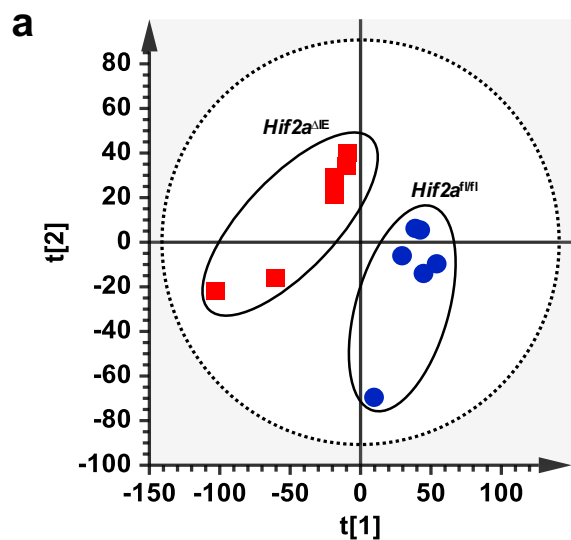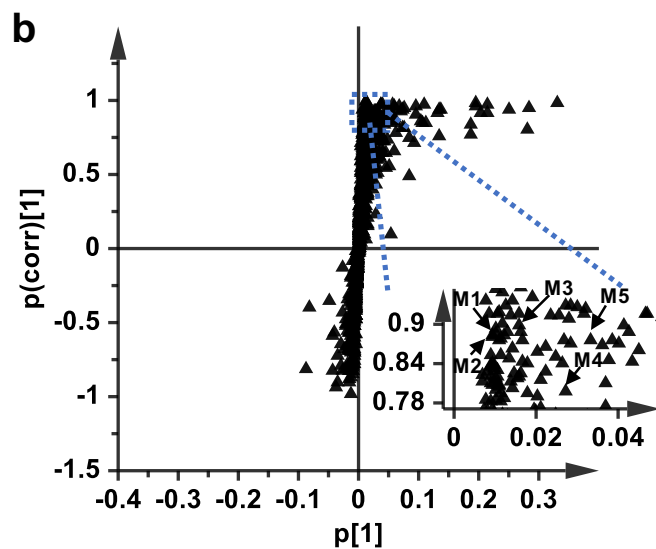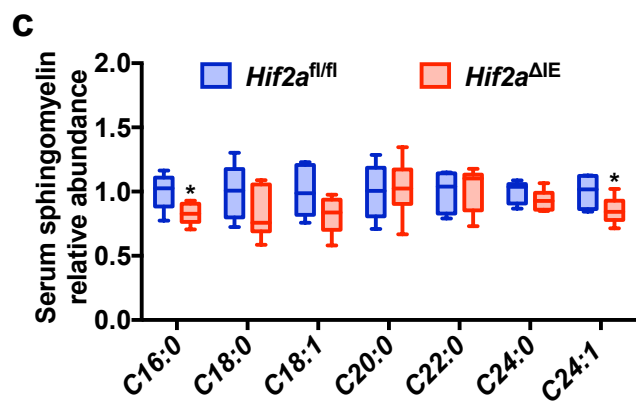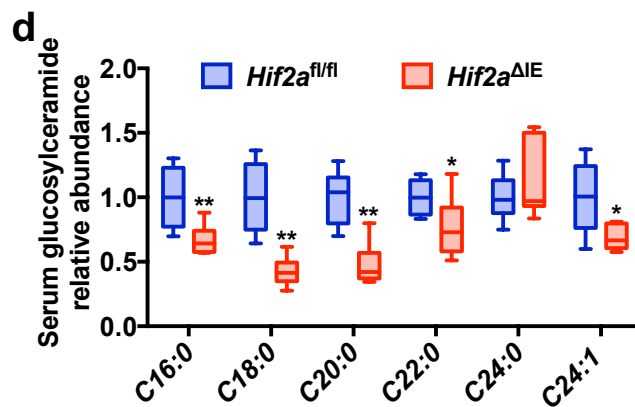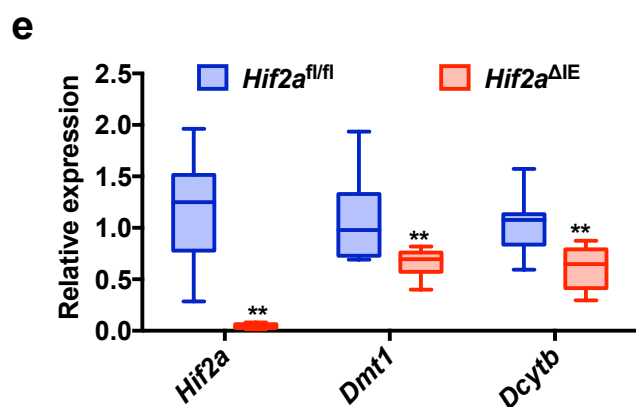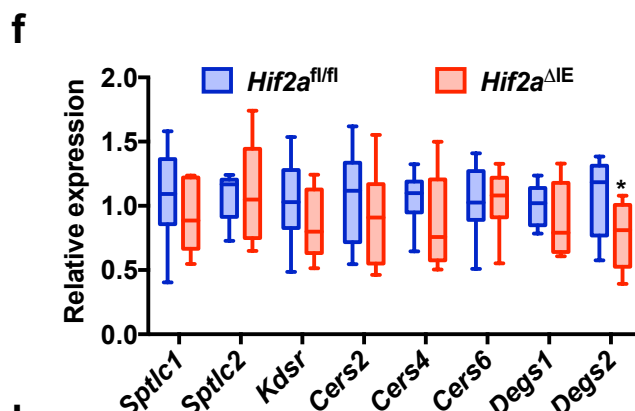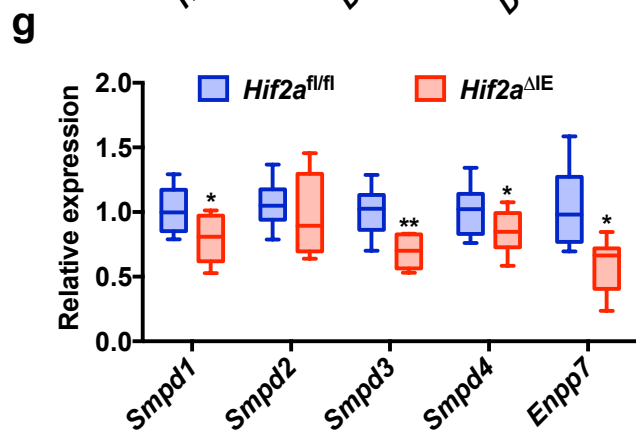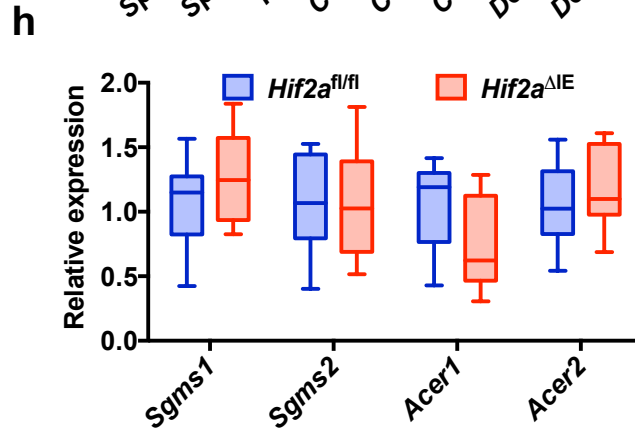

**Supplementary Figure 3.** Loss of HIF2 $\alpha$  in the intestine affects ceramide metabolism in HFD-fed *Hif2a*<sup>fl/fl</sup> and *Hif2a* <sup>$\Delta$ IE</sup> mice. **(a)** Score scatter plot of a PCA model of the serum metabolites between *Hif2a*<sup>fl/fl</sup> (circle) and *Hif2a* <sup>$\Delta$ IE</sup> (square) mice. **(b)** S-plot of an OPLS-DA model of the serum metabolites. **(c,d)** The relative levels of sphingomyelin **(c)** and glucosylceramide **(d)** in serum. **(e)** Expression of intestinal *Hif2a* mRNA and HIF2 $\alpha$  target gene mRNAs. **(f,g)** Intestinal expression of mRNAs encoded by ceramide synthesis-related genes, including the *de-novo* pathway **(f)** and the sphingomyelinase pathway **(g)**. **(h)** Intestinal expression of mRNAs encoded by ceramide catabolism-related genes.  $n = 6$ /group. For box plots, the midline represents the median; box represents the IQR between the first and third quartiles, and whiskers represent the lowest or highest values within 1.5 times IQR from the first or third quartiles. \* $P < 0.05$ , \*\* $P < 0.01$  versus *Hif2a*<sup>fl/fl</sup> mice, by two-tailed Student's *t*-test.

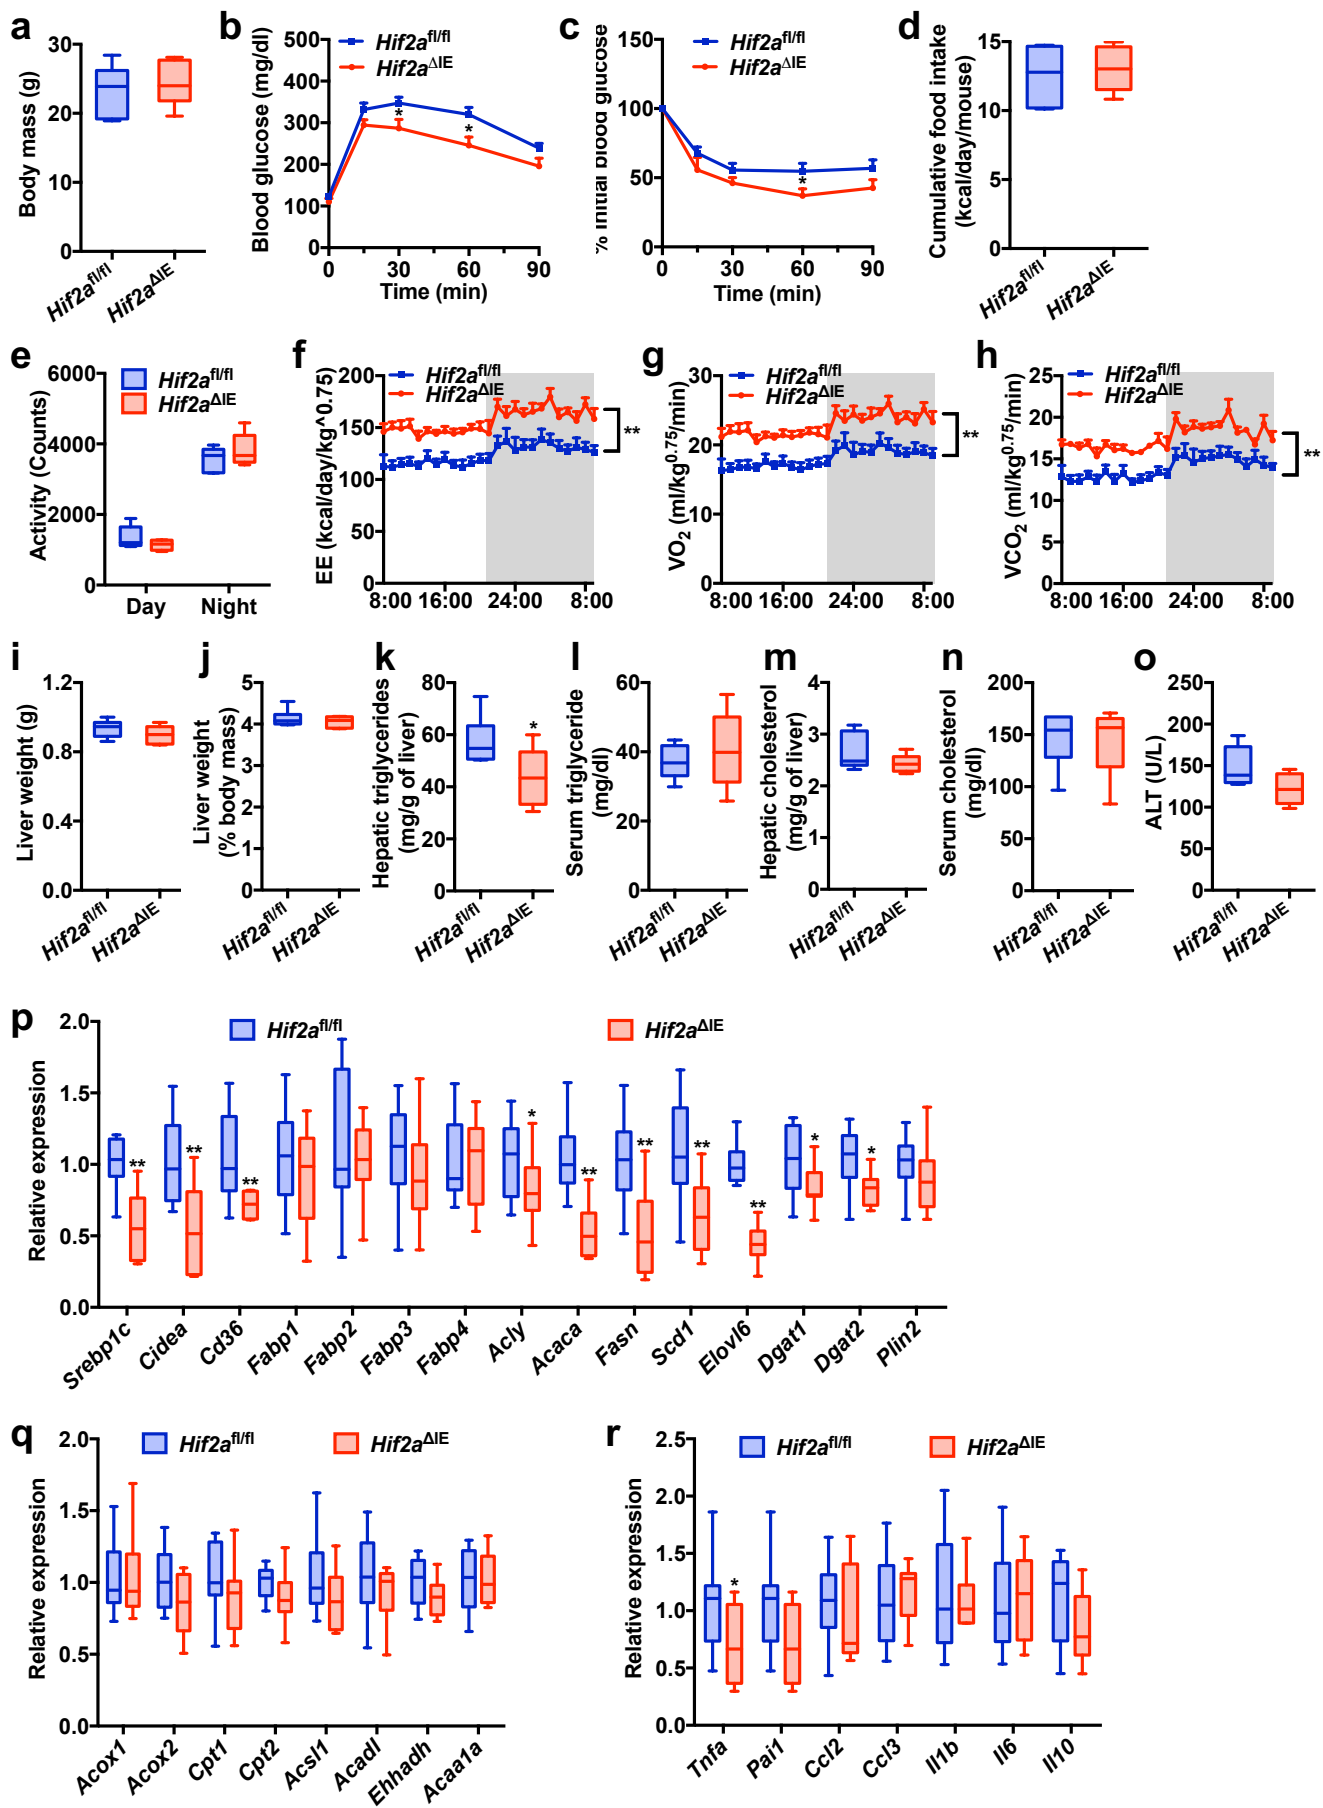

**Supplementary Figure 4.** Inhibition of the intestinal HIF2 $\alpha$  substantially increases the metabolic rate and decreases hepatic steatosis independent of body weight changes in HFD-fed *Hif2a*<sup>fl/fl</sup> and *Hif2a* <sup>$\Delta$ IE</sup> mice. **(a)** body weight. **(b)** Glucose tolerance test. **(c)** Insulin tolerance test. **(d)** Cumulative food intake. **(e)** Activity. **(f)** Energy expenditure. **(g)** Oxygen consumption rate. **(h)** Carbon dioxide production rate. **(i)** Liver weights. **(j)** Liver weight to body weight ratios. **(k,l)** Liver **(k)** and serum **(l)** triglyceride content. **(m,n)** Liver **(m)** and serum **(n)** cholesterol content. **(o)** Serum ALT levels ( $P = 0.08$ ). **(p)** Hepatic expression of mRNAs encoding fatty acid transport and lipogenesis. **(q)** Hepatic expression of mRNAs encoding fatty acid oxidation-related enzymes. **(r)** Hepatic expression of mRNAs encoding inflammatory cytokines and chemokines.  $n = 6$  for *Hif2a*<sup>fl/fl</sup> group and  $n = 5$  for *Hif2a* <sup>$\Delta$ IE</sup> group. For box plots, the midline represents the median; box represents the IQR between the first and third quartiles, and whiskers represent the lowest or highest values within 1.5 times IQR from the first or third quartiles. \* $P < 0.05$ , \*\* $P < 0.01$  versus *Hif2a*<sup>fl/fl</sup> mice, by two-tailed Student's  $t$ -test.



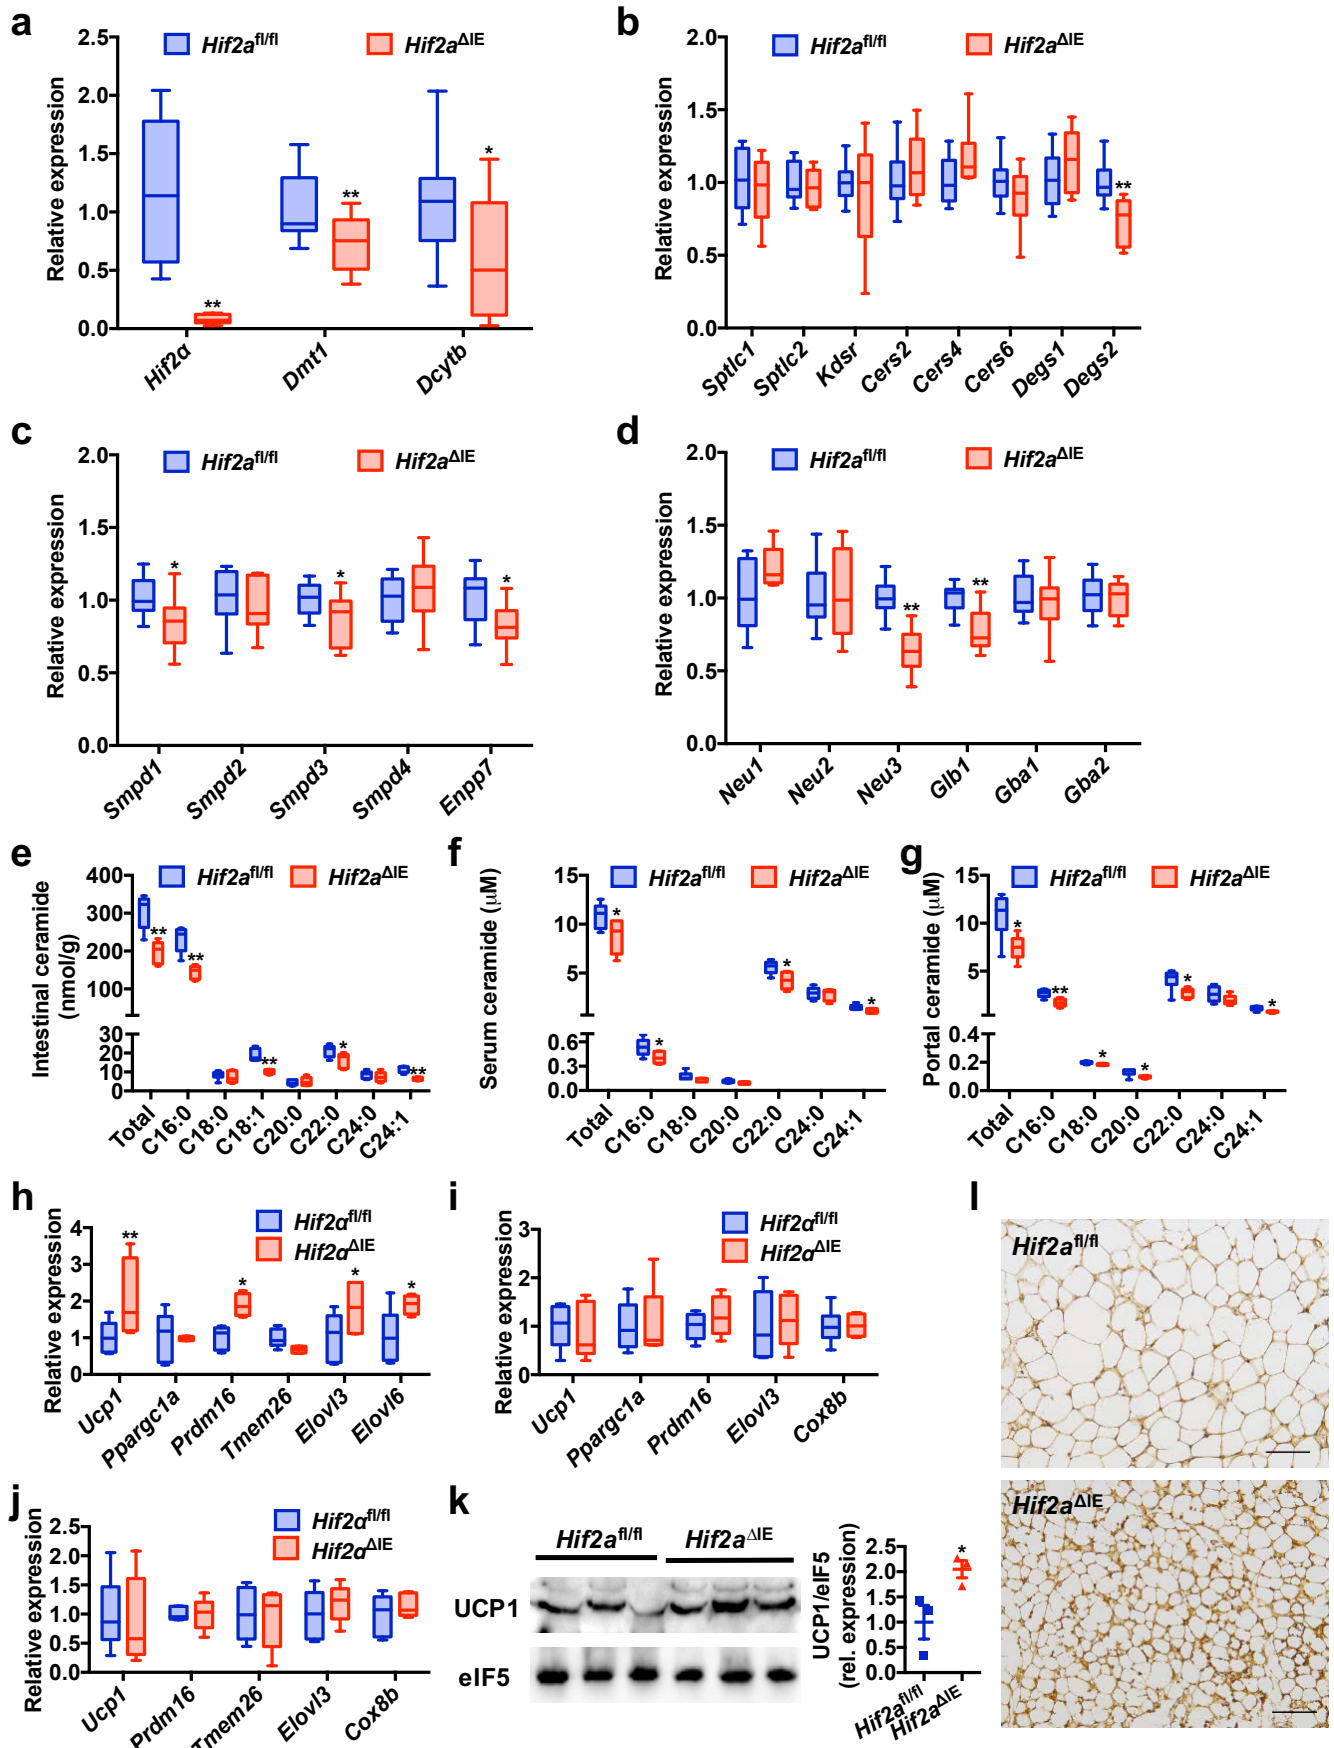

**Supplementary Figure 5.** Intestinal HIF2 $\alpha$  deficiency reduces ceramide synthesis in the small intestine independent of body weight changes in HFD-fed *Hif2a*<sup>fl/fl</sup> and *Hif2a* <sup>$\Delta$ IE</sup> mice. **(a)** Expression of intestinal *Hif2a* mRNA and HIF2 $\alpha$  target gene mRNAs. **(b–d)** Intestinal expression of mRNAs encoded by ceramide synthesis-related genes, including the *de-novo* pathway **(b)**, the sphingomyelinase pathway **(c)**, and the salvage pathway **(d)**. **(e–g)** Ceramide levels in the small intestine **(e)**, systematic serum **(f)**, and portal serum **(g)**. **(h–j)** Thermogenic gene expression in scWAT **(h)**, BAT **(i)**, and eWAT **(j)**. **(k)** Western blot analysis of UCP1 protein expression in scWAT ( $n = 3$ /group). Data are presented as the mean  $\pm$  sem.  $n = 6$  for *Hif2a*<sup>fl/fl</sup> group and  $n = 5$  for *Hif2a* <sup>$\Delta$ IE</sup> group. For box plots, the midline represents the median; box represents the IQR between the first and third quartiles, and whiskers represent the lowest or highest values within 1.5 times IQR from the first or third quartiles. \* $P < 0.05$ , \*\* $P < 0.01$  versus *Hif2a*<sup>fl/fl</sup> mice, by two-tailed Student's *t*-test. **(l)** Representative UCP1 immunohistochemistry staining of scWAT sections ( $n = 3$  images/mice). Scale, 100  $\mu$ m.

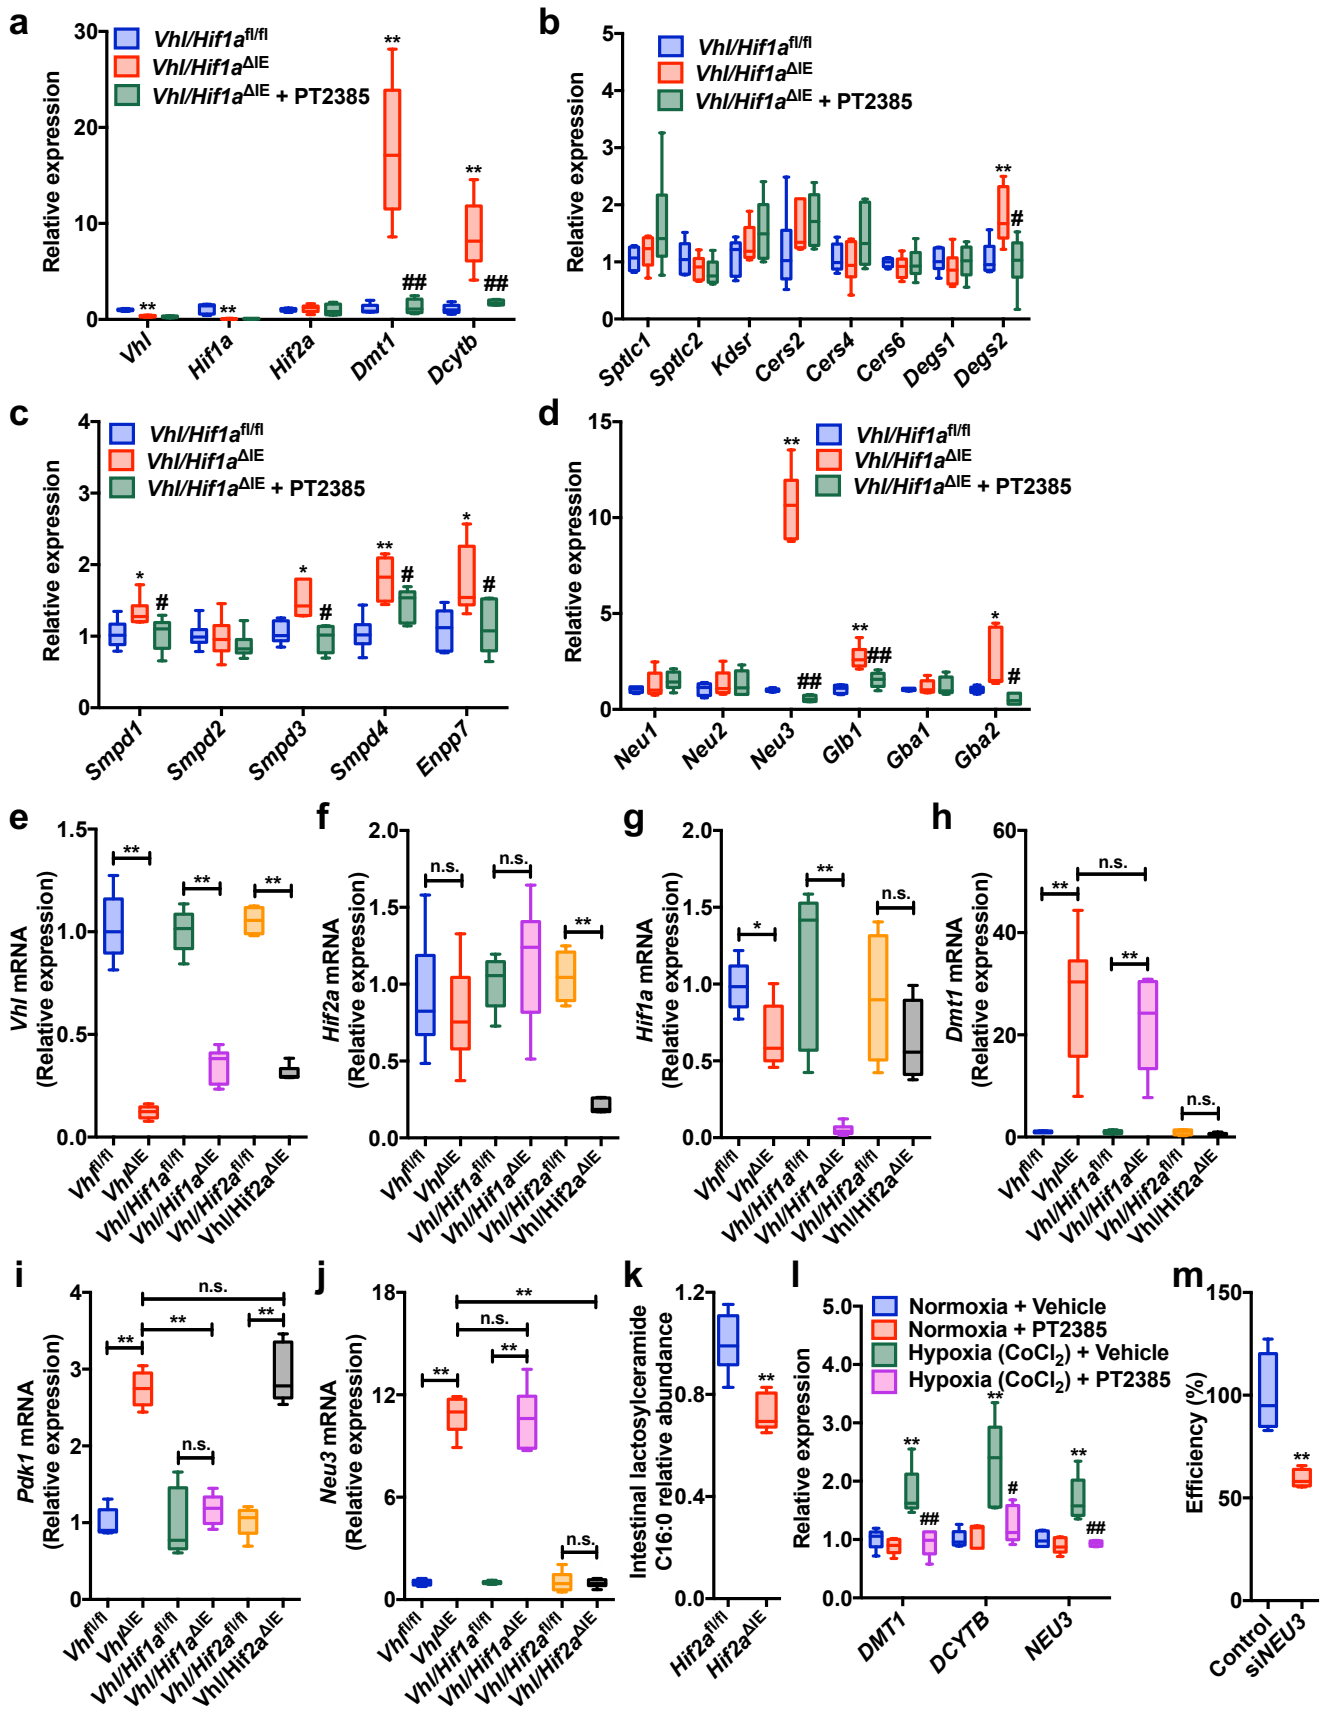

**Supplementary Figure 6.** HIF2 $\alpha$  regulates the ceramide synthesis in the small intestine. **(a)** Intestinal expression of *Vhl*, *Hif1a*, *Hif2a*, *Dmt1* and *Dcytb* mRNAs. **(b–d)** Intestinal expression of mRNAs

encoded by ceramide synthesis-related genes, including the *de-novo* pathway (**b**), the sphingomyelinase pathway (**c**), and the salvage pathway (**d**). Male *Vhl/Hif1a<sup>fl/fl</sup>* and *Vhl/Hif1a<sup>ΔIE</sup>* mice fed a chow diet were treated with or without PT2385 (20 mg/kg) for three consecutive days ( $n = 4$  to 6/group).  $*P < 0.05$ ,  $**P < 0.01$  versus vehicle-treated *Vhl/Hif1a<sup>fl/fl</sup>* mice,  $\#P < 0.05$ ,  $\#\#P < 0.01$  versus vehicle-treated *Vhl/Hif1a<sup>ΔIE</sup>* mice, by one-way ANOVA with Tukey's correction. (**e-j**) Intestinal mRNA expression levels of *Vhl* (**e**), *Hif2a* (**f**), *Hif1a* (**g**), *Dmt1* (**h**), *Pdk1* (**i**), and *Neu3* (**j**) in *Vhl<sup>fl/fl</sup>*, *Vhl<sup>ΔIE</sup>*, *Vhl/Hif1a<sup>fl/fl</sup>*, *Vhl/Hif1a<sup>ΔIE</sup>*, *Vhl/Hif2a<sup>fl/fl</sup>*, and *Vhl/Hif2a<sup>ΔIE</sup>* mice fed a chow diet ( $n = 4$  to 6/group). (**k**) The relative levels of lactosylceramide C16:0 in the small intestine from *Hif2a<sup>fl/fl</sup>* and *Hif2a<sup>ΔIE</sup>* mice fed a HFD for 12 weeks ( $n = 6$ /group).  $**P < 0.01$  versus *Hif2a<sup>fl/fl</sup>* mice, by two-tailed Student's *t*-test. (**l**) mRNA expression of *DMT1*, *DCYTB*, and *NEU3* in HCT116 cells treated with vehicle or PT2385 and exposed to either vehicle or  $\text{CoCl}_2$  ( $n = 5$ /group).  $**P < 0.01$  versus Normoxia + Vehicle treatment,  $\#P < 0.05$ ,  $\#\#P < 0.01$  versus Hypoxia ( $\text{CoCl}_2$ ) + Vehicle treatment, by one-way ANOVA with Tukey's correction. (**m**) The knockdown efficiency of si*NEU3* in HCT116 cells.  $**P < 0.01$ , by two-tailed Student's *t*-test. For box plots, the midline represents the median; box represents the IQR between the first and third quartiles, and whiskers represent the lowest or highest values within 1.5 times IQR from the first or third quartiles.

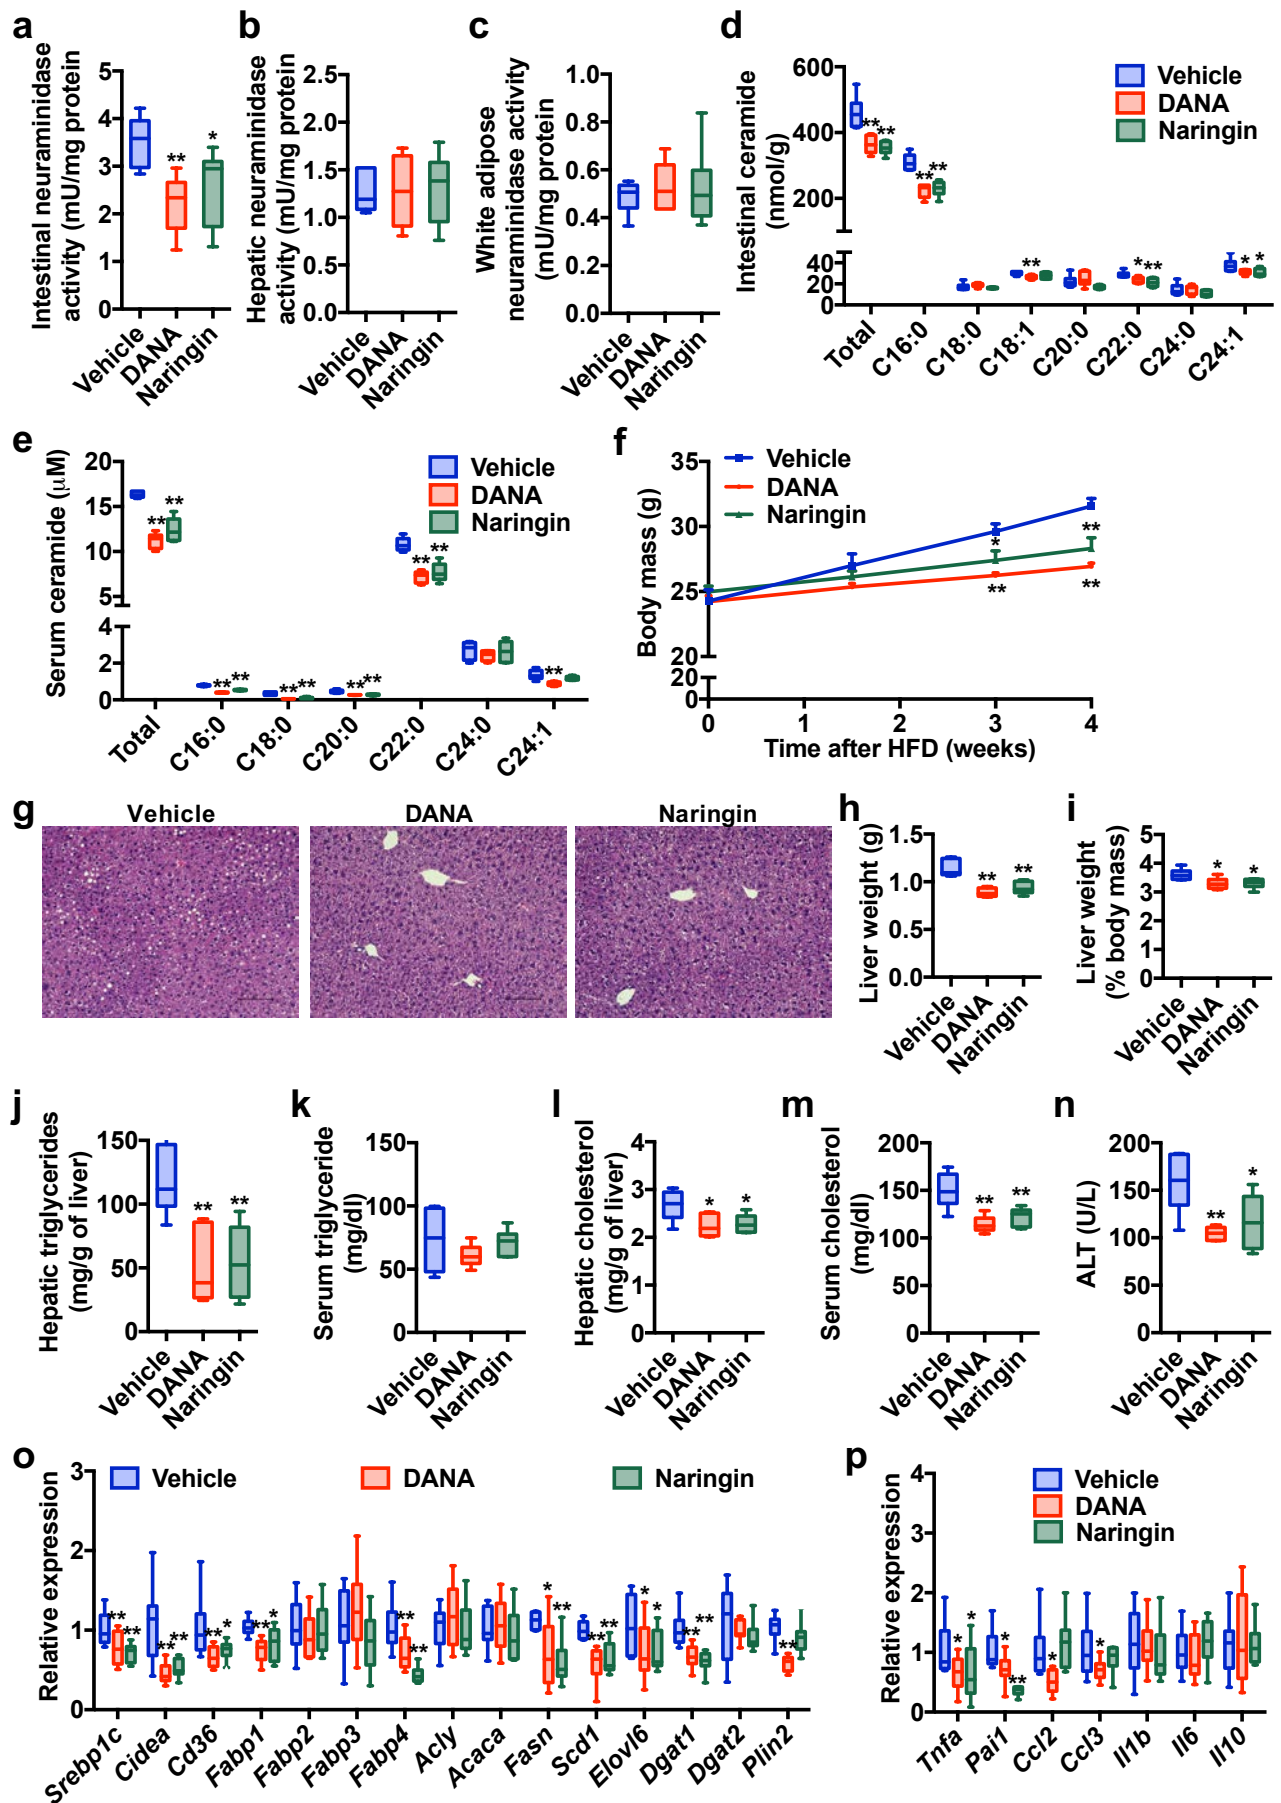

**Supplementary Figure 7.** NEU3 inhibitor DANA and naringin treatments protect mice from HFD-induced obesity and hepatic steatosis. **(a–c)** Neuraminidase activities in intestine **(a)**, liver **(b)**, and white adipose tissue **(c)**. **(d,e)** Ceramide levels in the small intestine **(d)** and serum **(e)**. **(f)** Growth curves. **(g)** Representative H&E staining of liver sections ( $n = 3$  images/mouse). Scale bars, 100  $\mu\text{m}$ . **(h)** Liver weights. **(i)** Liver weight to body weight ratios. **(j,k)** Liver **(j)** and serum **(k)** triglyceride content. **(l,m)** Liver **(l)** and serum **(m)** cholesterol content. **(n)** Serum ALT levels. **(o)** Hepatic expression of mRNAs encoding fatty acid transport and lipogenesis. **(p)** Hepatic expression of mRNAs encoding inflammatory cytokines and chemokines.  $n = 6/\text{group}$ . Data are presented as the mean  $\pm$  sem. For box plots, the midline represents the median; box represents the IQR between the first and third quartiles, and whiskers represent the lowest or highest values within 1.5 times IQR from the first or third quartiles.  $*P < 0.05$ ,  $**P < 0.01$  versus vehicle treatment, by two-tailed Student's  $t$ -test.

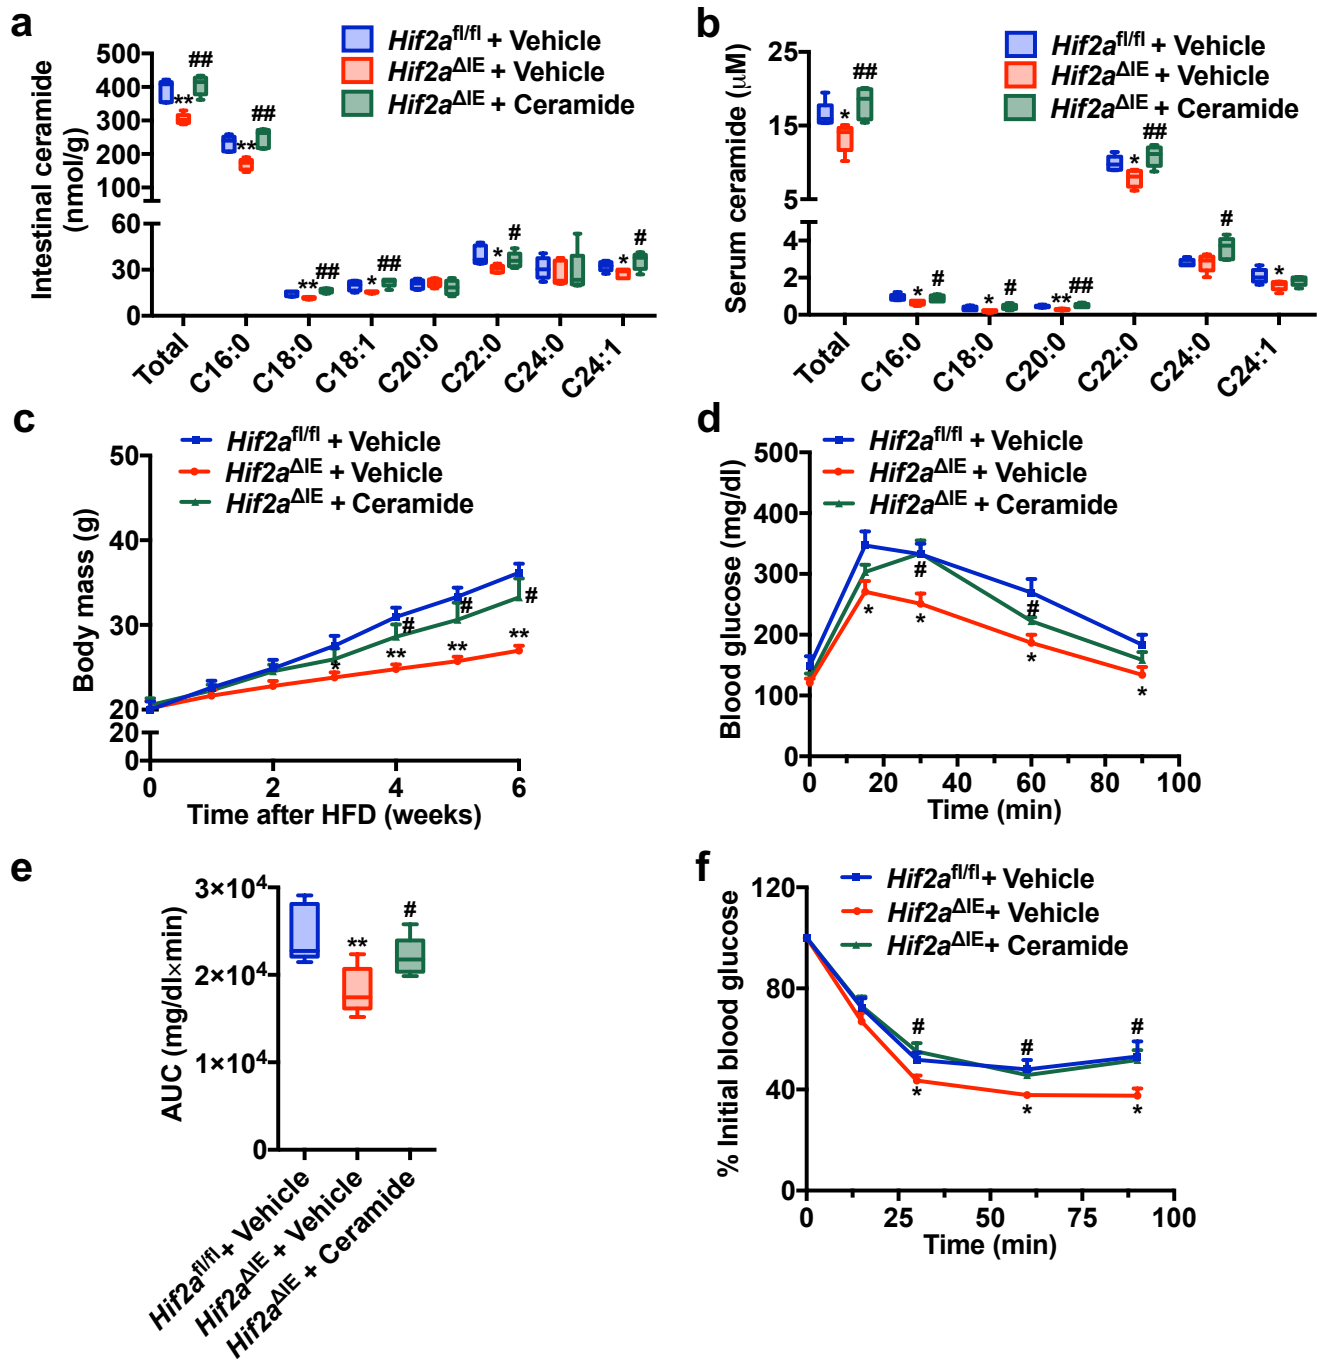

**Supplementary Figure 8.** Administration of ceramide reverses the protective effects of intestinal HIF2 $\alpha$  inhibition on the HFD-induced obesity and insulin resistance in *Hif2a*<sup>fl/fl</sup> and *Hif2a*<sup>ΔIE</sup>. (a,b) Ceramide levels in the small intestine (a) and serum (b). (c) Growth curves. (d,e) Glucose tolerance test (d) and glucose AUC (e). (f) Insulin tolerance test.  $n = 5/\text{group}$ . Data are presented as the mean  $\pm$  sem. For box plots, the midline represents the median; box represents the IQR between the first and third quartiles, and whiskers represent the lowest or highest values within 1.5 times IQR from the first or third quartiles. \* $P < 0.05$ , \*\* $P < 0.01$  versus vehicle-treated *Hif2a*<sup>fl/fl</sup> mice, # $P < 0.05$ , ## $P < 0.01$  versus vehicle-treated *Hif2a*<sup>ΔIE</sup> mice, by one-way ANOVA with Tukey's correction.

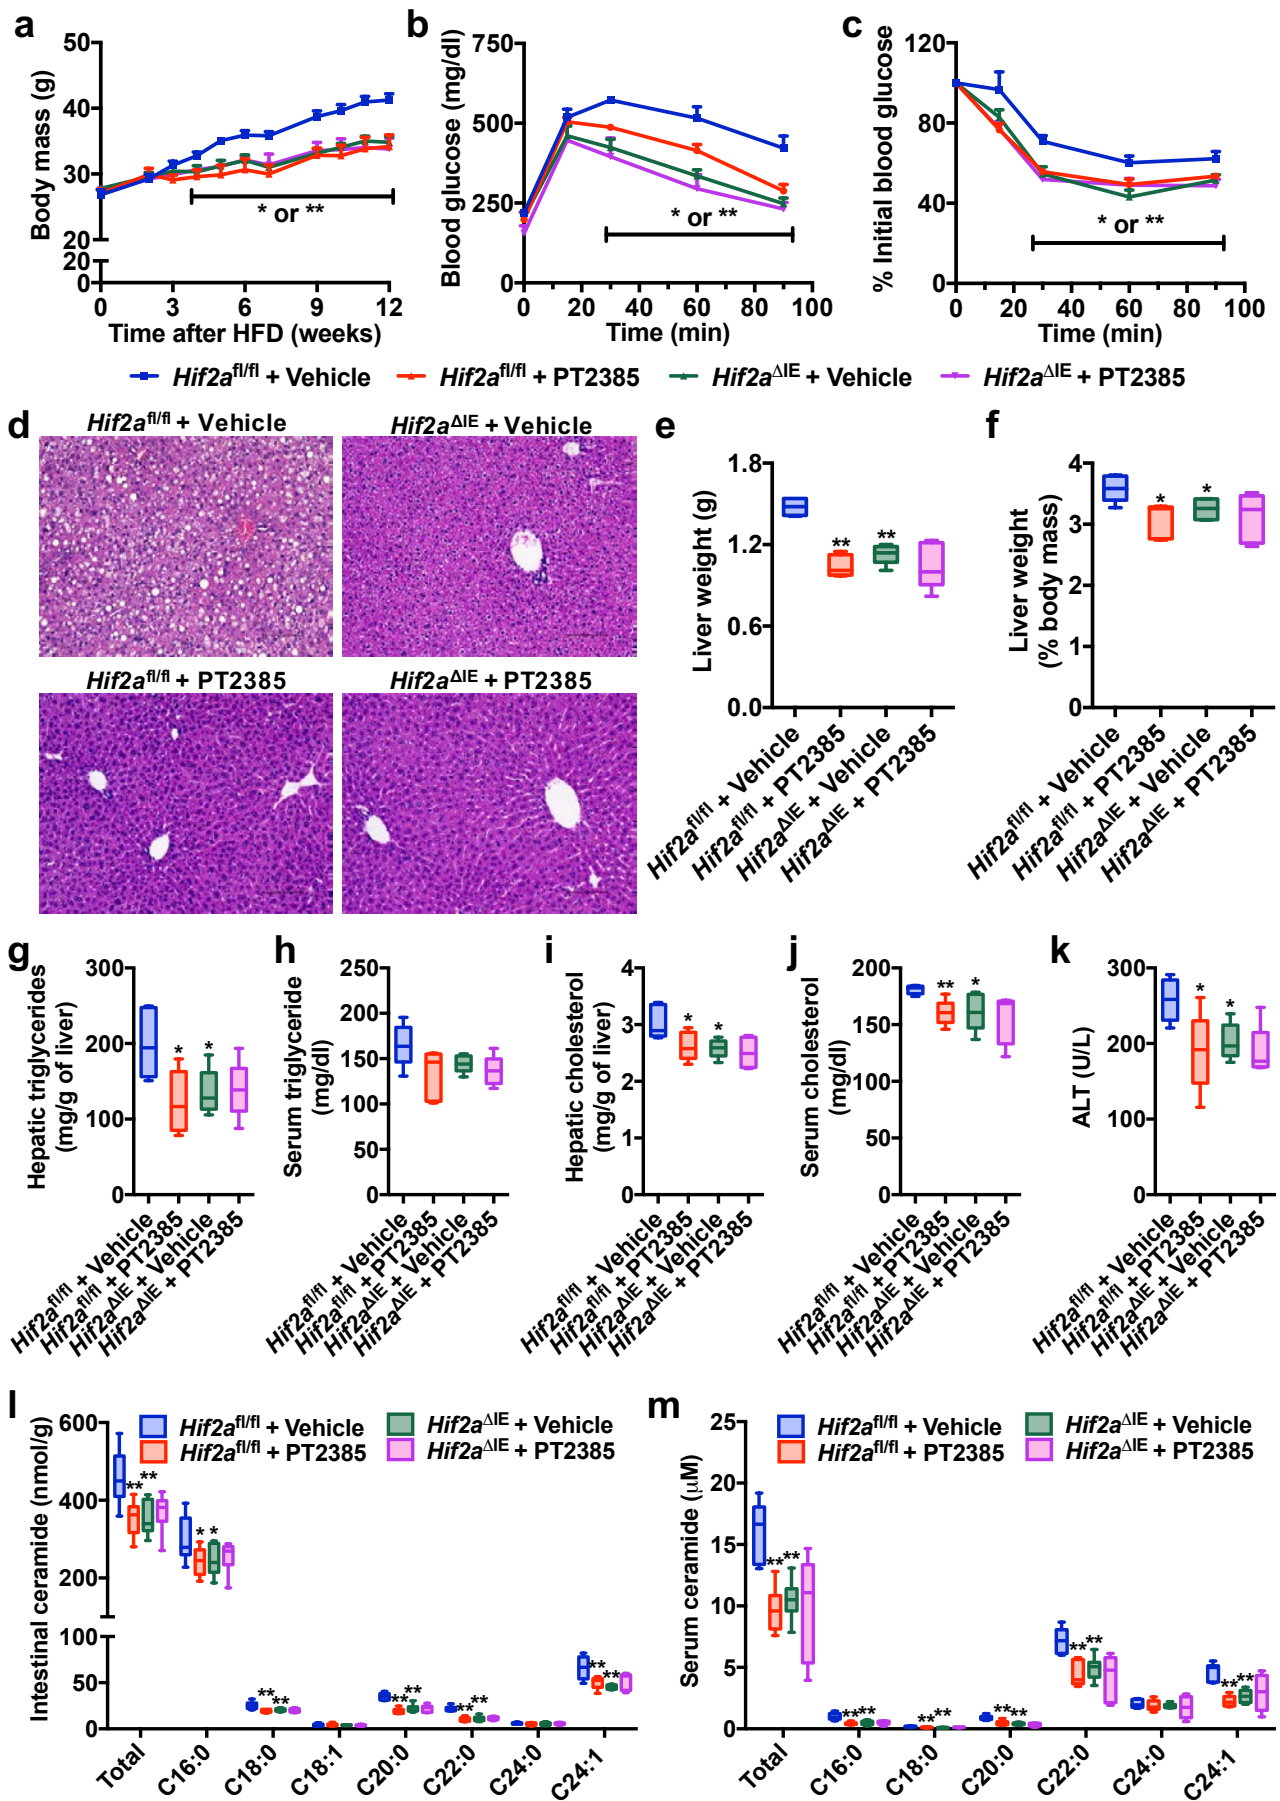



**Supplementary Figure 9.** PT2385 prevents mice from HFD-induced obesity and hepatic steatosis through inhibition of the intestinal HIF2 $\alpha$ -ceramide axis in *Hif2a*<sup>fl/fl</sup> and *Hif2a* <sup>$\Delta$ IE</sup> mice. **(a)** Growth curves. **(b)** Glucose tolerance test. **(c)** Insulin tolerance test. **(d)** Representative H&E staining of liver sections ( $n = 3$  images/mouse). Scale bars: 100  $\mu$ m. **(e)** Liver weights. **(f)** Liver weight to body weight ratios. **(g,h)** Liver **(g)** and serum **(h)** triglyceride content. **(i,j)** Liver **(i)** and serum **(j)** cholesterol content. **(k)** Serum ALT levels. **(l)** Quantitation of ceramide concentrations in the intestine. **(m)** Quantitation of ceramide concentrations in serum.  $n = 5$ /group. Data are presented as the mean  $\pm$  sd. For box plots, the midline represents the median; box represents the IQR between the first and third quartiles, and whiskers represent the lowest or highest values within 1.5 times IQR from the first or third quartiles. \* $P < 0.05$ , \*\* $P < 0.01$  versus vehicle-treated *Hif2a*<sup>fl/fl</sup> mice, by one-way ANOVA with Tukey's correction.

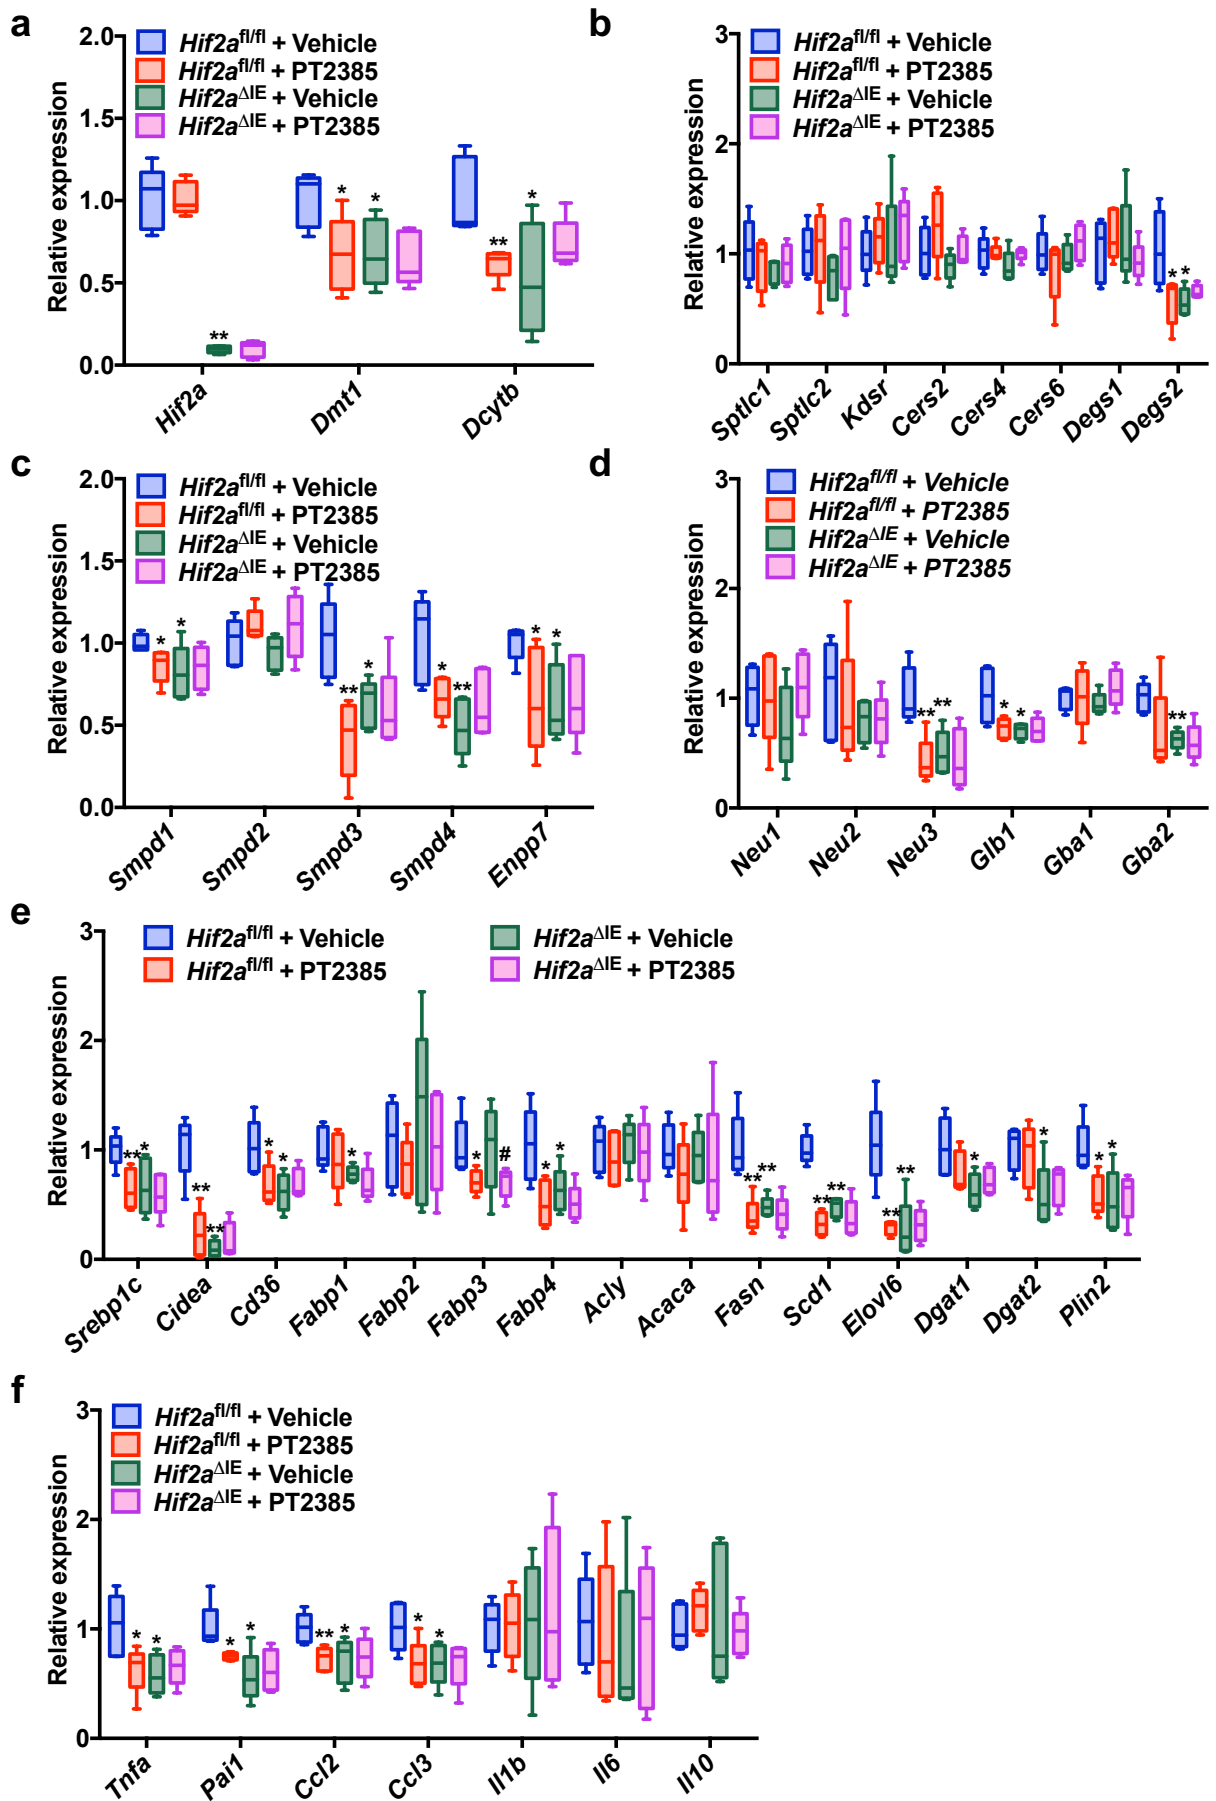

**Supplementary Figure 10.** PT2385 inhibits ceramide synthesis in the small intestine and alters fatty acid synthesis, metabolism, and inflammation in the liver dependent on intestinal HIF2 $\alpha$  in *Hif2a*<sup>fl/fl</sup> and *Hif2a* <sup>$\Delta$ IE</sup> mice. **(a)** Expression of *Hif2a* mRNA and its target gene mRNAs in the intestine. **(b–d)** Intestinal expression of mRNAs encoded by ceramide synthesis-related genes, including the *de-novo* pathway **(b)**, the sphingomyelinase pathway **(c)** and the salvage pathway **(d)**. **(e)** Hepatic expression of mRNAs encoding fatty acid transport and lipogenesis. **(f)** Hepatic expression of mRNAs encoding inflammatory cytokines and chemokines.  $n = 5/\text{group}$ . For box plots, the midline represents the median; box represents the IQR between the first and third quartiles, and whiskers represent the lowest or highest values within 1.5 times IQR from the first or third quartiles. \* $P < 0.05$ , \*\* $P < 0.01$  versus vehicle-treated *Hif2a*<sup>fl/fl</sup> mice, by one-way ANOVA with Tukey's correction.

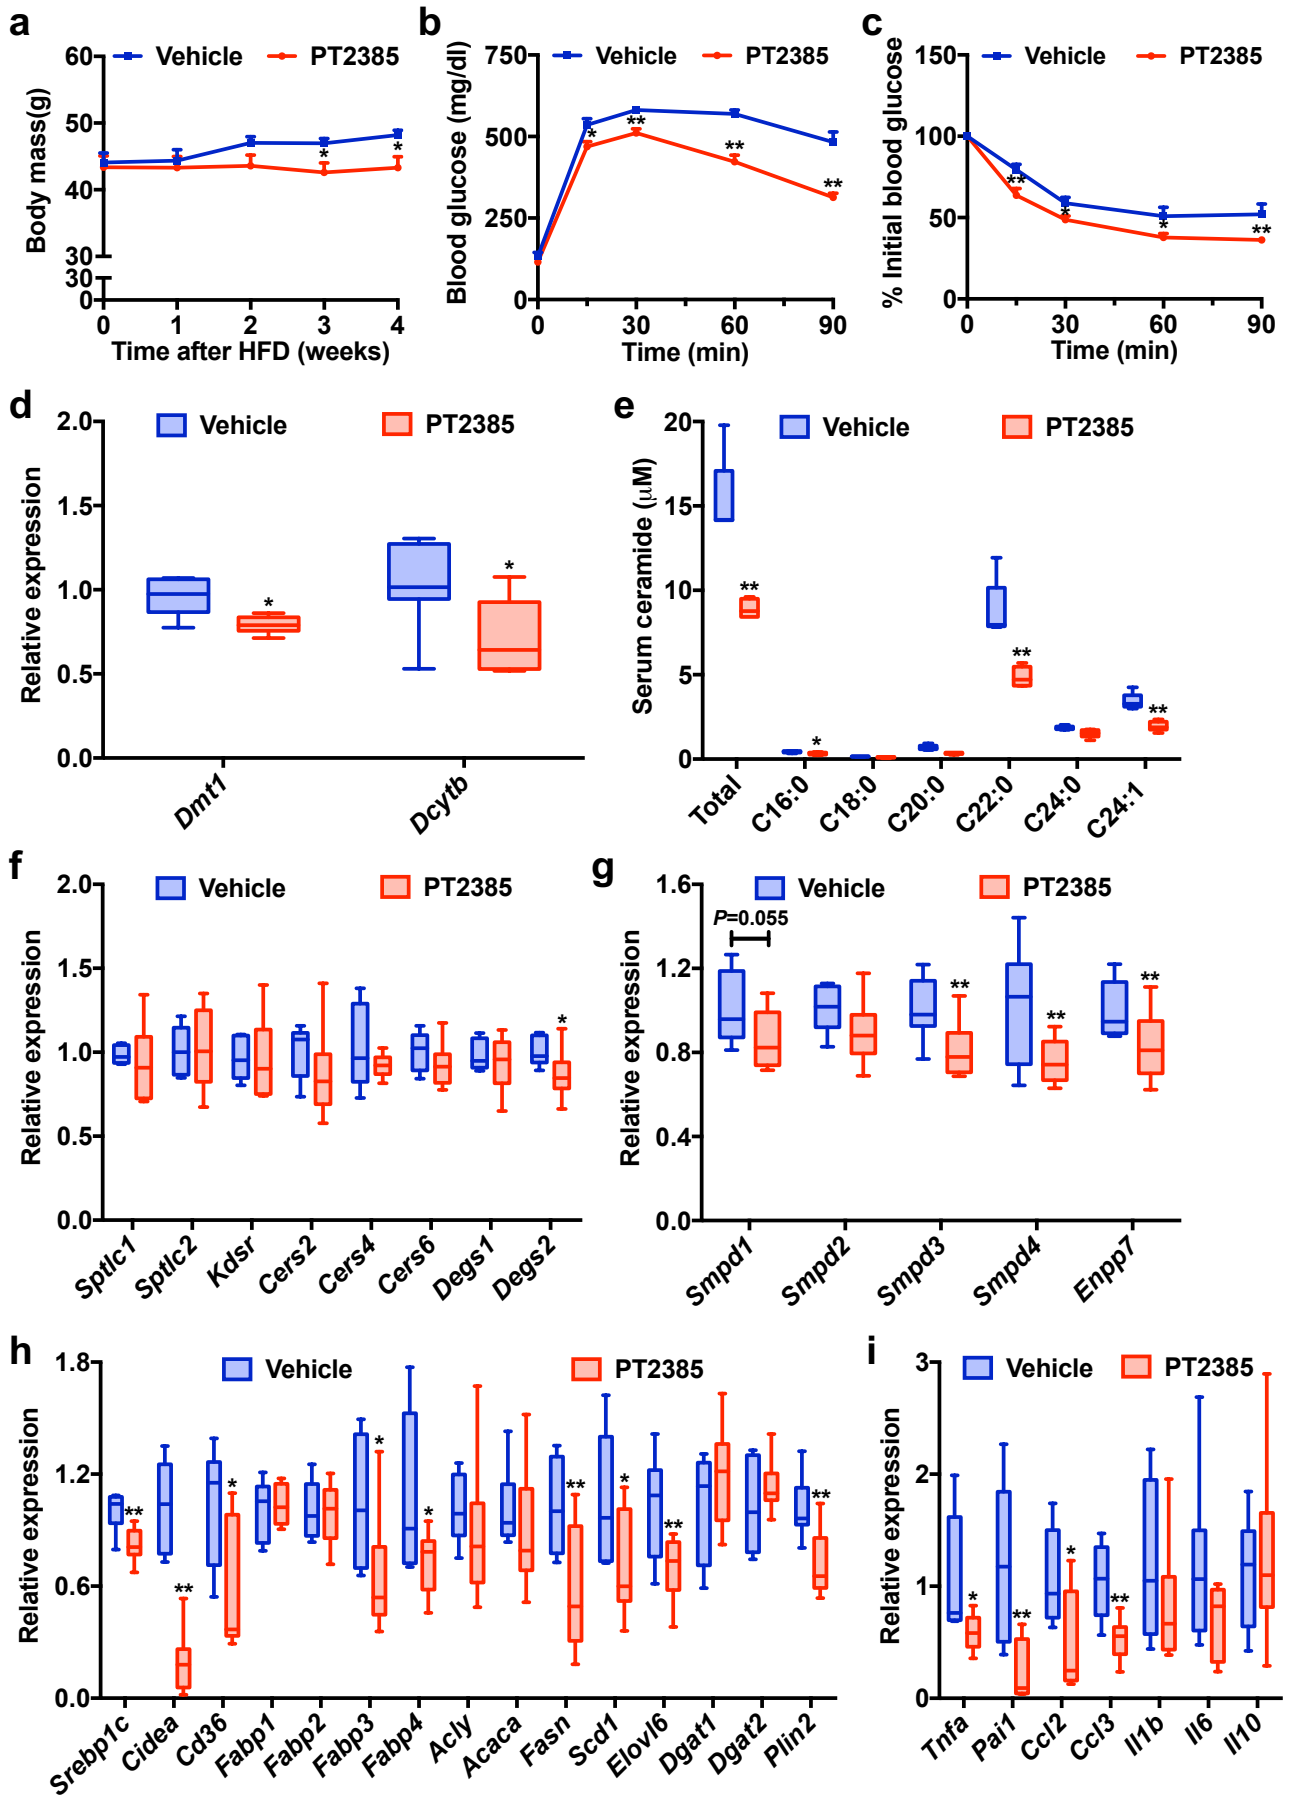

**Supplementary Figure 11.** PT2385 reverses metabolic dysfunctions in HFD-induced obese mice. **(a)** Growth curves. **(b)** glucose tolerance test. **(c)** Insulin tolerance test. **(d)** Expression levels of HIF2 $\alpha$  target gene mRNAs in the intestine. **(e)** Quantitation of ceramide concentrations in serum. **(f,g)** Intestinal expression of mRNAs encoded by ceramide synthesis-related genes, including the *de novo* pathway **(f)** and the sphingomyelinase pathway **(g)**. **(h)** Hepatic expression of mRNA encoding fatty acid transport and lipogenesis-related enzymes. **(i)** Hepatic expression of mRNAs encoding inflammatory cytokines and chemokines.  $n = 4$  for vehicle group,  $n = 5$  for PT2385 group. Data are presented as the mean  $\pm$  sem. For box plots, the midline represents the median; box represents the IQR between the first and third quartiles, and whiskers represent the lowest or highest values within 1.5 times IQR from the first or third quartiles. \* $P < 0.05$ , \*\* $P < 0.01$  versus vehicle treatment, by two-tailed Student's  $t$ -test.

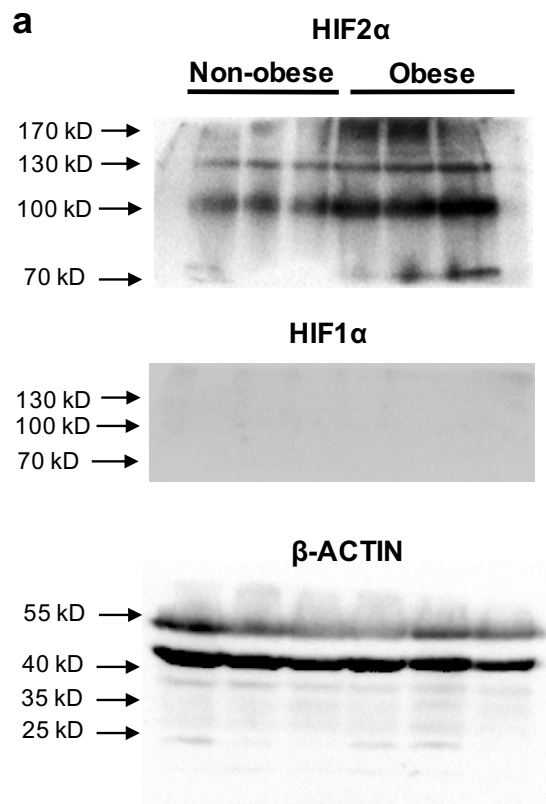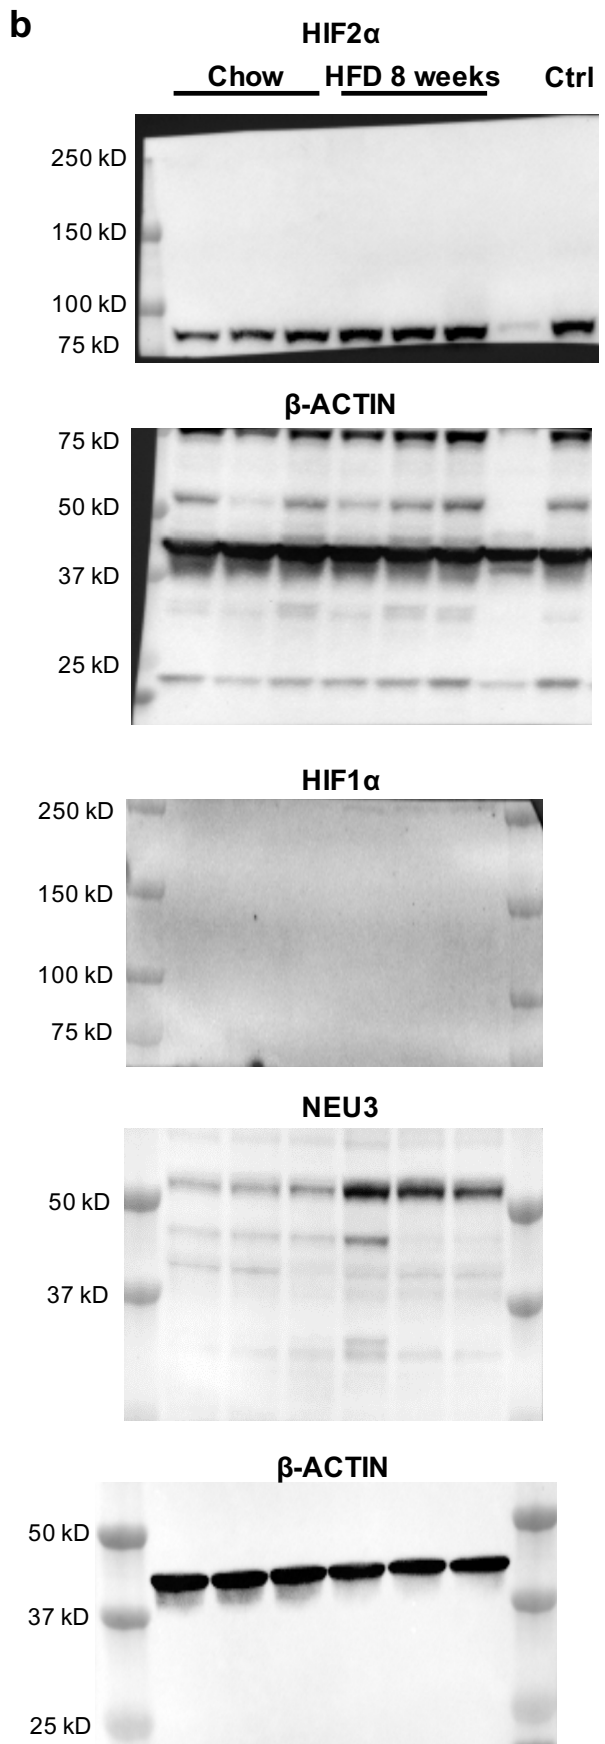

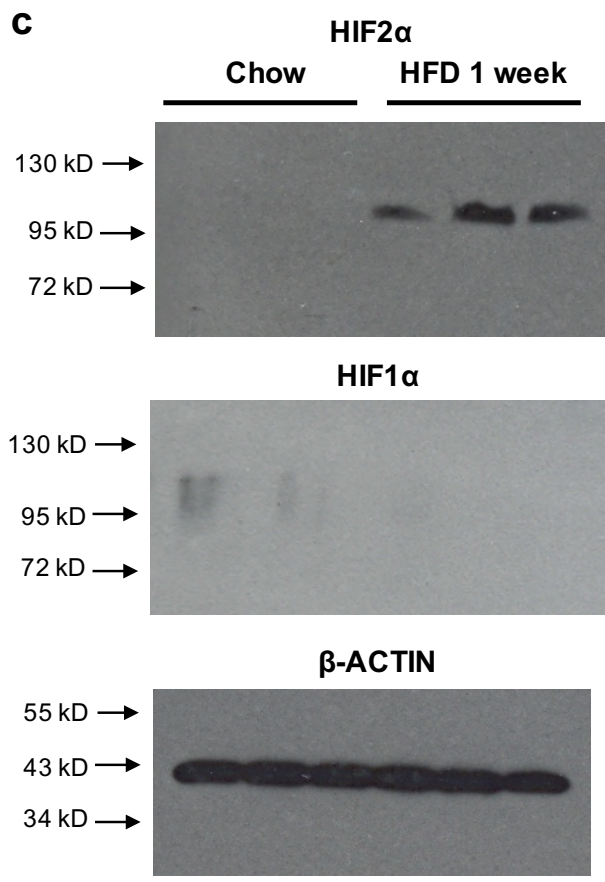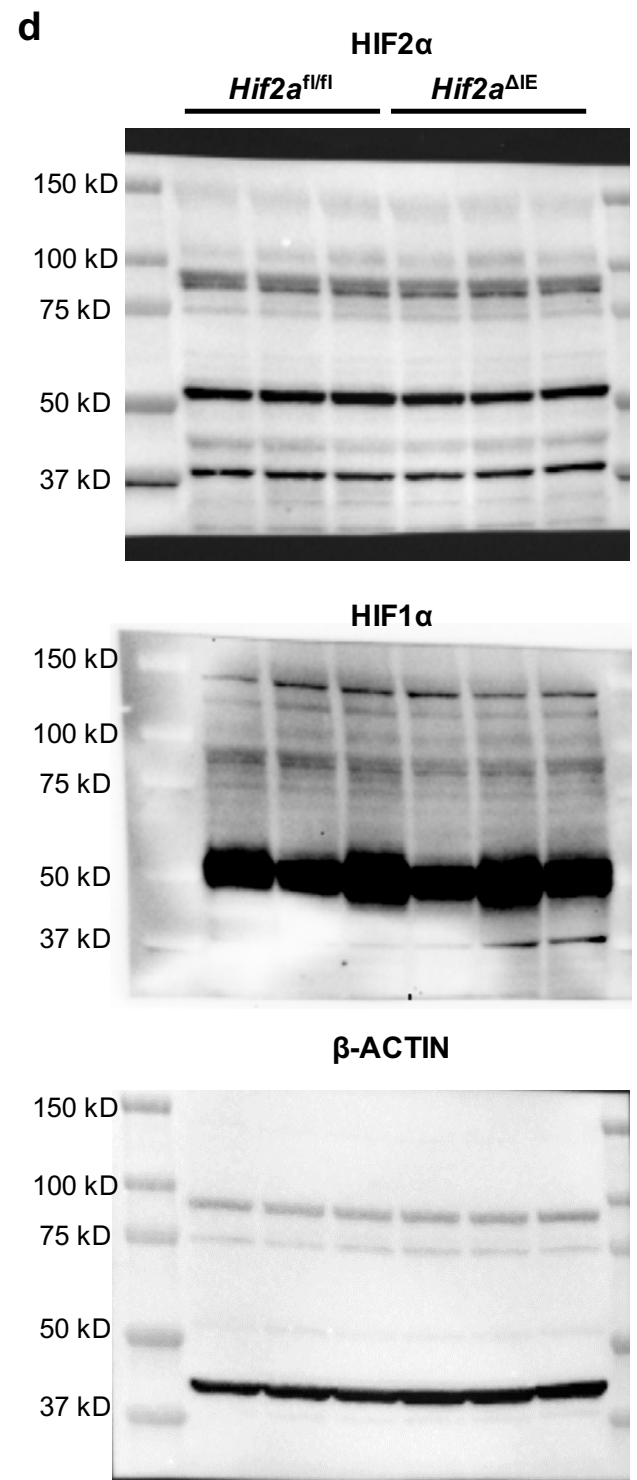

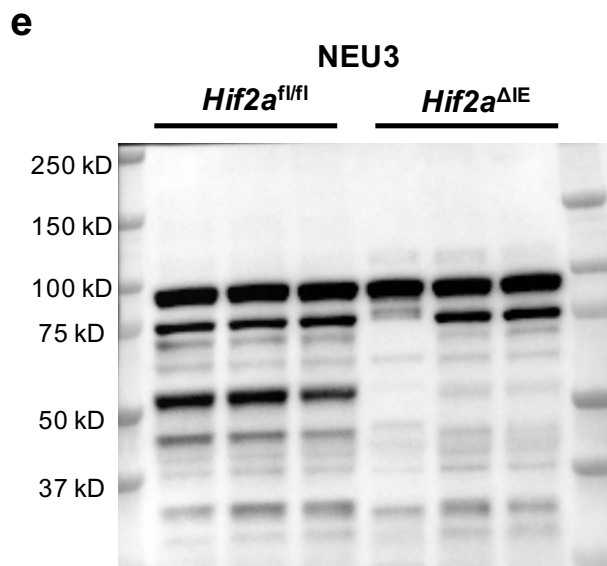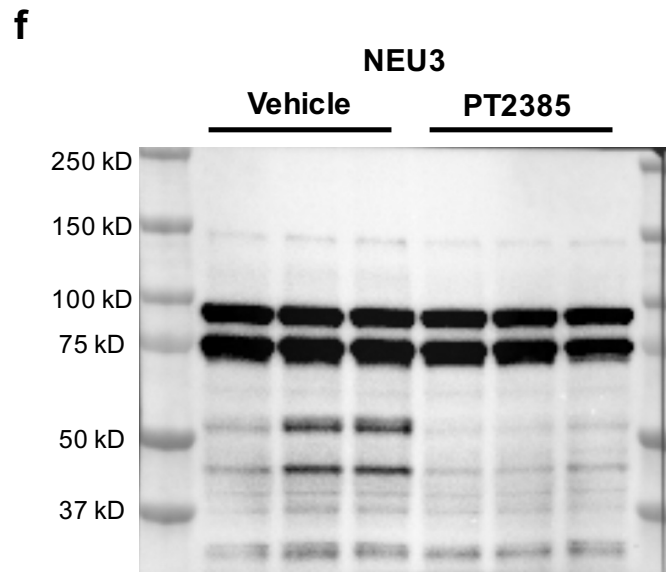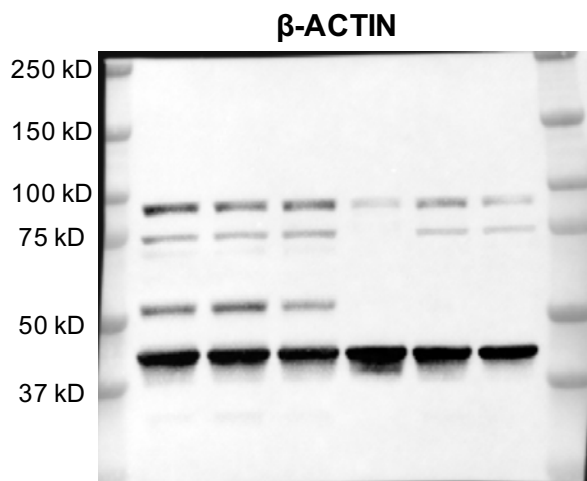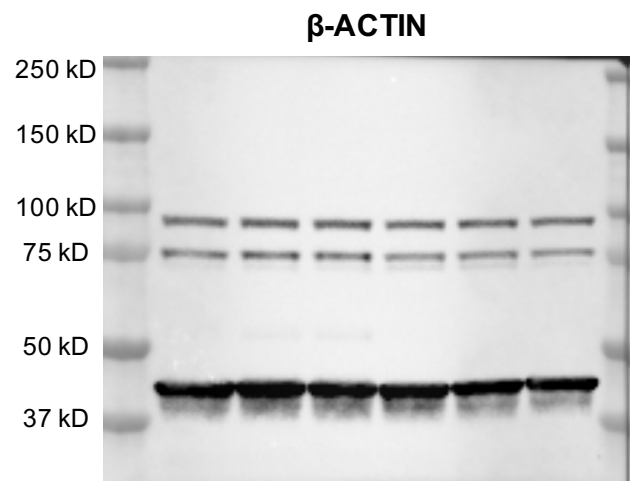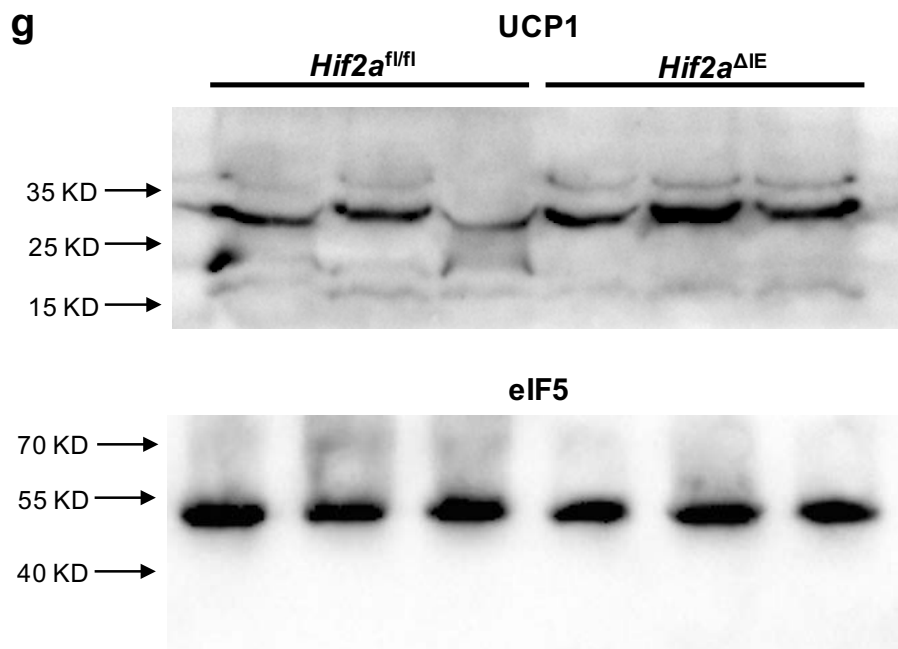



**Supplementary Figure 12.** Full western blot gel panels. **(a-d)** HIF2 $\alpha$ , HIF1 $\alpha$ , NEU3 and  $\beta$ -ACTIN from which the data in **Figure 1b (a)**, **Figure 1f (b)**, **Supplementary Figure 1b (c)**, **Figure 4g (b)** and **Supplementary Figure 2e (d)** were derived. **(e, f)** NUC3 and  $\beta$ -ACTIN from which the data in **Figure 4h (e)** and **Figure 6k (f)** were derived. **(g)** UCP1 and EIF5 from which the data in **Supplementary Figure 4v** were derived.

**Supplementary Table 1.** Demographic characteristics of the subjects

| <b>Characteristics</b>                    | <b>Non-obese</b> | <b>Obese</b>  |
|-------------------------------------------|------------------|---------------|
| <b>Cohort 1</b> ( <i>n</i> = 12)          |                  |               |
| Gender, <i>n</i> (%)                      |                  |               |
| Male                                      | 4 (66.7)         | 4 (66.7)      |
| Female                                    | 2 (33.3)         | 2 (33.3)      |
| Age, <i>y</i>                             |                  |               |
| Mean (sem)                                | 49.7 (4.8)       | 50.2 (6.0)    |
| Range                                     | 29.0-61.0        | 23.0-63.0     |
| Body weight, <i>kg</i>                    |                  |               |
| Mean (sem)                                | 59.5 (2.4)       | 76.0 (3.2) ** |
| Range                                     | 51.0-67.0        | 70.0-91.0     |
| Body mass index, <i>kg/m</i> <sup>2</sup> |                  |               |
| Mean (sem)                                | 21.5 (0.6)       | 28.5 (0.8) ** |
| Range                                     | 19.8-23.9        | 26.0-31.1     |
| <b>Cohort 2</b> ( <i>n</i> = 35)          |                  |               |
| Gender, <i>n</i> (%)                      |                  |               |
| Male                                      | 9 (50.0)         | 7 (41.2)      |
| Female                                    | 9 (50.0)         | 10 (58.8)     |
| Age, <i>y</i>                             |                  |               |
| Mean (sem)                                | 57.4 (3.2)       | 54.7 (2.2)    |
| Range                                     | 23.0-73.0        | 36.0-69.0     |
| Body weight, <i>kg</i>                    |                  |               |
| Mean (sem)                                | 55.7 (1.2)       | 82.1 (1.5) ** |
| Range                                     | 49.0-65.0        | 72.0-90.0     |
| Body mass index, <i>kg/m</i> <sup>2</sup> |                  |               |
| Mean (sem)                                | 20.4 (0.6)       | 29.8 (0.3) ** |
| Range                                     | 15.8-25.0        | 28.1-32.8     |

\*\**P* < 0.01 versus Non-obese, by two-tailed Student's t-test.

**Supplementary Table 2.** Clinical biochemistry of the subjects

| <b>Laboratory analytes</b>       | <b>Non-obese</b> | <b>Obese</b> | <b>P value</b> |
|----------------------------------|------------------|--------------|----------------|
| <b>Cohort 1</b> ( <i>n</i> = 12) |                  |              |                |
| Liver enzymes, <i>U/L</i>        |                  |              |                |
| ALT                              | 13.2 (1.3)       | 25.0 (4.2)   | 0.0222         |
| AST                              | 17.5 (2.7)       | 30.3 (4.0)   | 0.0241         |
| Lipids, <i>mM</i>                |                  |              |                |
| Triglycerides                    | 1.57 (0.33)      | 2.67 (0.44)  | 0.0755         |
| Cholesterol                      | 4.14 (0.46)      | 4.79 (0.32)  | 0.2695         |
| HDL                              | 1.25 (0.14)      | 0.99 (0.21)  | 0.3359         |
| LDL                              | 2.07 (0.45)      | 3.29 (0.36)  | 0.0615         |
| Glucose, <i>mM</i>               | 5.35 (0.27)      | 5.39 (0.37)  | 0.9352         |
| <b>Cohort 2</b> ( <i>n</i> = 35) |                  |              |                |
| Liver enzymes, <i>U/L</i>        |                  |              |                |
| ALT                              | 19.6 (1.4)       | 38.2 (4.2)   | 0.0001         |
| AST                              | 19.0 (1.4)       | 41.4 (4.8)   | 0.0001         |
| Lipids, <i>mM</i>                |                  |              |                |
| Triglycerides                    | 1.45 (0.16)      | 1.79 (0.12)  | 0.1045         |
| Cholesterol                      | 3.63 (0.10)      | 4.22 (0.25)  | 0.0352         |
| HDL                              | 1.09 (0.04)      | 1.01 (0.06)  | 0.2630         |
| LDL                              | 1.99 (0.09)      | 2.67 (0.19)  | 0.0027         |
| Glucose, <i>mM</i>               | 5.42 (0.18)      | 6.13 (0.36)  | 0.0798         |

Data are presented as mean (sem). Two-tailed Student's t-test.

**Supplementary Table 3.** Primer list

| <b>Mouse primers</b> | <b>Sequence</b>                 |
|----------------------|---------------------------------|
| <i>β-Actin</i> FWD   | 5'- GGCTGTATTCCCCTCCATCG -3'    |
| <i>β-Actin</i> REV   | 5'- CCAGTTGGTAACAATGCCATGT -3'  |
| <i>Hif1a</i> FWD     | 5'- ATAGCTTCGCAGAATGCTCAGA -3'  |
| <i>Hif1a</i> REV     | 5'- CAGTCACCTGGTTGCTGCAA -3'    |
| <i>Hif2a</i> FWD     | 5'- TGAGTTGGCTCATGAGTTGC -3'    |
| <i>Hif2a</i> REV     | 5'- TATGTGTCCGAAGGAAGCTG -3'    |
| <i>Dmt1</i> FWD      | 5'- TGTTTGATTGCATTGGGTCTG -3'   |
| <i>Dmt1</i> REV      | 5'- CGCTCAGCAGGACTTTCGAG -3'    |
| <i>Dcytb</i> FWD     | 5'- CATCCTCGCCATCATCTC -3'      |
| <i>Dcytb</i> REV     | 5'- GGCATTGCCTCCATTTAGCTG -3'   |
| <i>Pdk1</i> FWD      | 5'- TTA CT CAGT GGAACACCGCC -3' |
| <i>Pdk1</i> REV      | 5'- GTTTATCCCCCGATT CAGGT -3'   |
| <i>Vhl</i> FWD       | 5'- ACATCGTCAGGTC ACTCTATGA -3' |
| <i>Vhl</i> REV       | 5'- CTCTTGGCTCAGTCGCTGTAT -3'   |
| <i>Sptlc1</i> FWD    | 5'- CGAGGGTTCTATGGCACATT-3'     |
| <i>Sptlc1</i> REV    | 5'- GGTGGAGAAGCCATACGAGT -3'    |
| <i>Sptlc2</i> FWD    | 5'- TCACCTCCATGAAGTGCATC -3'    |
| <i>Sptlc2</i> REV    | 5'- CAGGCGTCTCCTGAAATACC -3'    |
| <i>Kdsr</i> FWD      | 5'- TCCAGTGGCATTGGGAAGTG -3'    |
| <i>Kdsr</i> REV      | 5'- CTTCTCTTGTGCCTGCTTTATGA -3' |
| <i>Degs1</i> FWD     | 5'- AATGGGTCTACACGGACCAG -3'    |
| <i>Degs1</i> REV     | 5'- TGGTCAGGTTTCATCAAGGAC -3'   |
| <i>Degs2</i> FWD     | 5'- AAGCCAATGGACCACAAACT -3'    |
| <i>Degs2</i> REV     | 5'- TGCTTGGAGAGCCCTTCTAAT -3'   |
| <i>Cers2</i> FWD     | 5'- AAGTGGGAAACGGAGTAGCG-3'     |
| <i>Cers2</i> REV     | 5'- ACAGGCAGCCATAGTCGTTC -3'    |
| <i>Cers4</i> FWD     | 5'- GGATTAGCTGATCTCCGCAC -3'    |
| <i>Cers4</i> REV     | 5'- CCAGTATGTCTCCTGCCACA -3'    |
| <i>Cers6</i> FWD     | 5'- AAGCCAATGGACCACAAACT -3'    |
| <i>Cers6</i> REV     | 5'- TGCTTGGAGAGCCCTTCTAAT -3'   |
| <i>Smpd1</i> FWD     | 5'- GTTACCAGCTGATGCCCTTC -3'    |
| <i>Smpd1</i> REV     | 5'- AGCAGGATCTGTGGAGTTG -3'     |
| <i>Smpd2</i> FWD     | 5'- AGCAGGATCTGTGGAGTTG -3'     |
| <i>Smpd2</i> REV     | 5'- CTCCAGCCATGAAGCTCAAC -3'    |
| <i>Smpd3</i> FWD     | 5'- CCTGACCAGTGCCATTCTTT -3'    |
| <i>Smpd3</i> REV     | 5'- AGAAACCCGGTCCTCGTACT -3'    |

|                    |                                  |
|--------------------|----------------------------------|
| <i>Smpd4 FWD</i>   | 5'- ACCTGGCCCTCAATCCATTTG -3'    |
| <i>Smpd4 REV</i>   | 5'- ATAGGCACAGTCCGAAGTACG -3'    |
| <i>Enpp7 FWD</i>   | 5'- AAGCCCAGTATATGACTCCTGC -3'   |
| <i>Enpp7 REV</i>   | 5'- ACCGTGCTGGTGGTATTGTAG -3'    |
| <i>Neu1 FWD</i>    | 5'- GGACCGCTGAGCTATTGGG -3'      |
| <i>Neu1 REV</i>    | 5'- CGGGATGCGGAAAGTGTCTA -3'     |
| <i>Neu2 FWD</i>    | 5'- CACAGGCGTCCATGCTTACA -3'     |
| <i>Neu2 REV</i>    | 5'- CTGCGTGCTCATCCGTCTT -3'      |
| <i>Neu3 FWD</i>    | 5'- ATGGAGGCCACATTACCTGG -3'     |
| <i>Neu3 REV</i>    | 5'- TCTGGCACCTCTCAGTAACAT -3'    |
| <i>Glb1 FWD</i>    | 5'- GCACGGCATCTATAATGTCACC -3'   |
| <i>Glb1 REV</i>    | 5'- GTATCGGAATGGCTGTCCATC -3'    |
| <i>Gba1 FWD</i>    | 5'- GCCAGGCTCATCGGATTCTTC -3'    |
| <i>Gba1 REV</i>    | 5'- CACGGGGTCAAGAGAGTCAC -3'     |
| <i>Gba2 FWD</i>    | 5'- GGCTGTGCCGAAAGAGATTC -3'     |
| <i>Gba2 REV</i>    | 5'- ATCCTGGGGTCCACTATCCTC -3'    |
| <i>Galc FWD</i>    | 5'- CGCCTACGTGCTAGACGAC -3'      |
| <i>Galc REV</i>    | 5'- ACGATAGGGCTCTGGGTAATTT -3'   |
| <i>Srebp1c FWD</i> | 5'- GGAGCCATGGATTGCACATT-3'      |
| <i>Srebp1c REV</i> | 5'- GCTTCCAGAGAGGAGGCCAG -3'     |
| <i>Cidea FWD</i>   | 5'- TGACATTCATGGGATTGCAGAC -3'   |
| <i>Cidea REV</i>   | 5'- GGCCAGTTGTGATGACTAAGAC -3'   |
| <i>Cd36 FWD</i>    | 5'- AGATGACGTGGCAAAGAACAG -3'    |
| <i>Cd36 REV</i>    | 5'- CCTTGGCTAGATAACGAACTCTG -3'  |
| <i>Fabp1 FWD</i>   | 5'- ATGAACTTCTCCGGCAAGTACC -3'   |
| <i>Fabp1 REV</i>   | 5'- CTGACACCCCCTTGATGTCC -3'     |
| <i>Fabp2 FWD</i>   | 5'- GTGGAAAGTAGACCGGAACGA -3'    |
| <i>Fabp2 REV</i>   | 5'- CCATCCTGTGTGATTGTCAGTT -3'   |
| <i>Fabp3 FWD</i>   | 5'- GTGGAAAGTAGACCGGAACGA -3'    |
| <i>Fabp3 REV</i>   | 5'- CCATCCTGTGTGATTGTCAGTT -3'   |
| <i>Fabp4 FWD</i>   | 5'- AAGGTGAAGAGCATCATAACCCT -3'  |
| <i>Fabp4 REV</i>   | 5'- TCACGCCTTTCATAACACATTCC -3'  |
| <i>Acly FWD</i>    | 5'- ACCCTTTCACTGGGGATCACA -3'    |
| <i>Acly REV</i>    | 5'- GACAGGGATCAGGATTTCTTG -3'    |
| <i>Acaca FWD</i>   | 5'- ATGGGCGGAATGGTCTCTTTC -3'    |
| <i>Acaca REV</i>   | 5'- TGGGGACCTTGTCTTCATCAT -3'    |
| <i>Fasn FWD</i>    | 5'- AAGTTGCCCGAGTCAGAGAACC -3'   |
| <i>Fasn REV</i>    | 5'- ATCCATAGAGCCCAGCCTTCCATC -3' |
| <i>Scd1 FWD</i>    | 5'- TTCTTGCGATACACTCTGGTGC -3'   |

|                   |                                  |
|-------------------|----------------------------------|
| <i>Scd1 REV</i>   | 5'- CGGGATTGAATGTTCTTGTCGT -3'   |
| <i>Elovl6 FWD</i> | 5'- GAAAAGCAGTTCAACGAGAACG -3'   |
| <i>Elovl6 REV</i> | 5'- AGATGCCGACCACCAAAGATA -3'    |
| <i>Dgat1 FWD</i>  | 5'- GACGGCTACTGGGATCTGA -3'      |
| <i>Dgat1 REV</i>  | 5'- TCACCACACACCAATTCAGG -3'     |
| <i>Dgat2 FWD</i>  | 5'- CGCAGCGAAAACAAGAATAA -3'     |
| <i>Dgat2 REV</i>  | 5'- GAAGATGTCTTGGAGGGCTG -3'     |
| <i>Plin2 FWD</i>  | 5'- GACCTTGTGTCTCCGCTTAT -3'     |
| <i>Plin2 REV</i>  | 5'- CAACCGCAATTTGTGGCTC -3'      |
| <i>Acox1 FWD</i>  | 5'- GGCACGGCTATTCTCACAG -3'      |
| <i>Acox1 REV</i>  | 5'- CATCAAGAACCTGGCCGTCT -3'     |
| <i>Acox2 FWD</i>  | 5'- ACGTCCTGAACGCATTTATG -3'     |
| <i>Acox2 REV</i>  | 5'- TTGGCCCCATTTAGCAATCTG -3'    |
| <i>Cpt1 FWD</i>   | 5'- GAACACAAATGTGCAAGCAGC -3'    |
| <i>Cpt1 REV</i>   | 5'- GCCATGACCGGCTTGATCTC -3'     |
| <i>Cpt2 FWD</i>   | 5'- CAGCACAGCATCGTACCCA -3'      |
| <i>Cpt2 REV</i>   | 5'- TCCCAATGCCGTTCTCAAAAT -3'    |
| <i>Acs11 FWD</i>  | 5'- CGATGGCTGTTGGACTTTGC -3'     |
| <i>Acs11 REV</i>  | 5'- CACCCAGGCTCGACTGTATC -3'     |
| <i>Acadl FWD</i>  | 5'- TCTTTTCCTCGGAGCATGACA -3'    |
| <i>Acadl REV</i>  | 5'- GACCTCTCTACTCACTTCTCCAG -3'  |
| <i>Ehhadh FWD</i> | 5'- CGGTCAATGCCATCAGTCCAA -3'    |
| <i>Ehhadh REV</i> | 5'- TGCTCCACAGATCACTATGGC -3'    |
| <i>Acaa1a FWD</i> | 5'- AGGCTTCAAGAACACCACCC -3'     |
| <i>Acaa1a REV</i> | 5'- GGCTCCTGGCTCAAGAACAT -3'     |
| <i>Tnfa FWD</i>   | 5'- AGGGTCTGGGCCATAGAACT -3'     |
| <i>Tnfa REV</i>   | 5'- CCACCACGCTCTTCTGTCTAC -3'    |
| <i>Pai1 FWD</i>   | 5'- TTCAGCCCTTGCTTGCCCTC -3'     |
| <i>Pai1 REV</i>   | 5'- ACACTTTTACTCCGAAGTCGGT -3'   |
| <i>Ccl2 FWD</i>   | 5'- TTAAAAACCTGGATCGGAACCAA -3'  |
| <i>Ccl2 REV</i>   | 5'- GCATTAGCTTCAGATTTACGGGT -3'  |
| <i>Ccl3 FWD</i>   | 5'- TTCTCTGTACCATGACACTCTGC -3'  |
| <i>Ccl3 REV</i>   | 5'- CGTGGAATCTTCCGGCTGTAG -3'    |
| <i>Il1b FWD</i>   | 5'- AAGAGCTTCAGGCAGGCAGTATCA -3' |
| <i>Il1b REV</i>   | 5'- TGCAGCTGTCTAGGAACGTCA -3'    |
| <i>Il6 FWD</i>    | 5'- TAGTCCTTCCACCCCAATTTCC -3'   |
| <i>Il6 REV</i>    | 5'- TTGGTCCTTAGCCACTCCTTC -3'    |
| <i>Il10 FWD</i>   | 5'- GCTCTTACTGACTGGCATGAG -3'    |
| <i>Il10 REV</i>   | 5'- CGCAGCTCTAGGAGCATGTG -3'     |

| <b>Human primers</b>                     | <b>Sequence</b>                       |
|------------------------------------------|---------------------------------------|
| <i>GAPDH FWD</i>                         | 5'- GGAGCGAGATCCCTCCAAAAT -3'         |
| <i>GAPDH REV</i>                         | 5'- GGCTGTTGTCATACTTCTCATGG -3'       |
| <i>HIF1A FWD</i>                         | 5'- GAACGTCGAAAAGAAAAGTCTCG -3'       |
| <i>HIF1A REV</i>                         | 3'- CCTTATCAAGATGCGAACTCACA -3'       |
| <i>HIF2A FWD</i>                         | 5'- CGGAGGTGTTCTATGAGCTGG -3'         |
| <i>HIF2A REV</i>                         | 5'- AGCTTGTGTGTTTCGCAGGAA -3'         |
| <i>DMT1 FWD</i>                          | 5'- GCTTCATACCCATCCTCACATT -3'        |
| <i>DMT1 REV</i>                          | 5'- TCCATTGGCAAAGTCACTCATT -3'        |
| <i>DCYTB FWD</i>                         | 5'- GGTGTTTTTCGTAAATACGCTTGG -3'      |
| <i>DCYTB REV</i>                         | 5'- ATTGCGGTCTGGTGA CTATCC -3'        |
| <i>PDK1 FWD</i>                          | 5'- CTGTGATACGGATCAGAAACCG -3'        |
| <i>PDK1 REV</i>                          | 5'- TCCACCAAACAATAAAGAGTGCT -3'       |
| <i>NEU3 FWD</i>                          | 5'- AAGTGACAACATGCTCCTTCAA -3'        |
| <i>NEU3 REV</i>                          | 5'- TCTCCTCGTAGAACGCTTCTC -3'         |
|                                          |                                       |
| <b>ChIP primers</b>                      | <b>Sequence</b>                       |
| <i>NEU3 FWD</i>                          | 5'- TGTCAAGAGGGGCCTTTTCC -3'          |
| <i>NEU3 REV</i>                          | 5'- ACAATCACACGCAAGGACCA -3'          |
|                                          |                                       |
| <b>Construct primers</b>                 | <b>Sequence</b>                       |
| <i>Neu3 promoter FWD</i>                 | 5'- AACTCGAGCACAGACGCTGAAACGAACCC -3' |
| <i>Neu3 promoter REV</i>                 | 5'- AAGGTACCTGCTGCAGTGTGTCAAGAGGG -3' |
| <i>Neu3 promoter<sup>ΔHRE1</sup> FWD</i> | 5'- CGCGCAGTCTGTGGAAGGTATCACCGCC -3'  |
| <i>Neu3 promoter<sup>ΔHRE1</sup> REV</i> | 5'- TTCCACAGACTGCGCGGTGAAGGGGC -3'    |
| <i>Neu3 promoter<sup>ΔHRE2</sup> FWD</i> | 5'- GAATCCATATCCCATTCTTCCCCACCTAC -3' |
| <i>Neu3 promoter<sup>ΔHRE2</sup> REV</i> | 5'- AATGGGATATGGATTCACTTGGTGACAG -3'  |
